# 1 Optimal resistance management for 2 mixtures of high-risk fungicides: 3 robustness to the initial frequency of 4 resistance and pathogen sexual 5 reproduction

6 Nick P Taylor<sup>1</sup> and Nik J Cunniffe<sup>\*1</sup>

\*For correspondence:

[njc1001@cam.ac.uk](mailto:njc1001@cam.ac.uk) (NJC)

7 <sup>1</sup>Department of Plant Sciences, University of Cambridge, Cambridge, UK

---

## 9 Abstract

10 There is a strong consensus that selection for fungicide resistant pathogen strains can be most  
11 effectively limited by using applications of mixtures of fungicides designed to balance disease  
12 control against selection. However, how to do this in practice is not entirely characterised.  
13 Previous work indicates optimal mixtures of pairs of fungicides which are both at a high risk of  
14 resistance can be constructed using pairs of doses which select equally for both single resistant  
15 strains in the first year of application. What has not been addressed thus far is the important  
16 real-world case in which the initial levels of resistance to each fungicide differ, for example  
17 because the chemicals have been available for different lengths of time. We show how  
18 recommendations based on equal selection in the first year can be sub-optimal in this case. We  
19 introduce a simple alternative approach, based on equalising the frequencies of single resistant  
20 strains in the year that achieving acceptable levels of control is predicted to become impossible.  
21 We show that this strategy is robust to changes in parameters controlling pathogen epidemiology  
22 and fungicide efficacy. We develop our recommendation using a pre-existing, parameterised

23 model of *Zymoseptoria tritici* (the pathogen causing Septoria leaf blotch on wheat), which  
24 exemplifies the range of plant pathogens which predominantly spread clonally, but for which  
25 sexual reproduction forms an important component of the life cycle. We show that pathogen  
26 sexual reproduction can influence the rate at which fungicide resistance develops, but does not  
27 qualitatively affect our optimal resistance management recommendation.

28

---

## 29 Introduction

30 World food security faces multiple threats, including the growing global population (*Godfray et al.,*  
31 *2010*), climate change (*Tai et al., 2014*) and plant disease (*Strange and Scott, 2005*). However, it is  
32 estimated that food production will need to increase by 60% by 2050 (*Ristaino et al., 2021*). Despite  
33 annual spending of roughly 16 billion US dollars on fungicides globally, estimated crop losses due to  
34 disease stand at 20% (*Jorgensen et al., 2017*). Fungicide resistance challenges our ability to maintain  
35 control of fungal pathogens, but effective resistance management strategies prolong control of  
36 these yield-limiting crop diseases and have been studied for decades (*Staub, 1991; van den Bosch*  
37 *et al., 2014a; Corkley et al., 2021*). We explore the optimal management of fungicide resistance in  
38 crop pathogens using mixtures containing pairs of fungicides which are ‘high-risk’ for resistance.  
39 In particular, we explore the effects of sexual pathogen reproduction and variation in initial levels  
40 of resistance.

41 We use Septoria leaf blotch (*Zymoseptoria tritici*), the most prevalent disease of wheat world-  
42 wide (*Suffert et al., 2011*), as our case study. An estimated 70% ( $\approx$ €1bn) of the European cereal  
43 fungicide market is primarily targeted towards the management of *Z. tritici* of winter wheat (*Tor-*  
44 *riani et al., 2015*). Most fungicide modelling studies focus on Septoria, so there are existing pa-  
45 rameterised models available (e.g. *Hobbelen et al. (2013); Elderfield et al. (2018)*). Further, it is a  
46 heterothallic fungus (*Suffert et al., 2016*) capable of both sexual and asexual reproduction (*Suffert*  
47 *et al., 2011; Eriksen et al., 2001; Singh et al., 2021*). It therefore exemplifies the large number of  
48 plant pathogens for which sexual reproduction is potentially important in the epidemiology (*Agrios,*  
49 *2004*) and evolution (*McDonald et al., 1996*). For Septoria, reported proportions of sexual repro-  
50 duction differ widely between experiments (*Chen and McDonald, 1996; Zhan et al., 1998*), but it  
51 is known that ascospores produced via sexual reproduction initiate Septoria epidemics within a

52 field (*Shaw and Royle, 1989*). Although ascospores are quantitatively the most significant form of  
53 primary inoculum (*Suffert et al., 2011*), for simplicity most fungicide resistance modelling studies  
54 do not consider pathogen sexual reproduction, although there are some exceptions (*Shaw, 1989*).  
55 Here we seek to understand the effect of the inclusion of pathogen sexual reproduction on the re-  
56 sulting resistance management recommendation. We neglect the effect of ascospores within the  
57 growing season, due to previous studies suggesting they have a small effect on the severity of an  
58 epidemic (*Eriksen et al., 2001*), in part caused by the longer latent period of the sexual pseudothe-  
59 cia compared to the clonal pycnidia. Optimal management principles for *Septoria* may transfer to  
60 other fungal and oomycete crop pathogens which reproduce sexually, e.g. *Phytophthora infestans*,  
61 cause of the potato disease late blight (*Fones et al., 2020*).

62 A common resistance management strategy is to use fungicide mixtures with more than one  
63 mode of action present in the mixture. These fungicides are often categorised as 'low-risk' or 'high-  
64 risk' for resistance, depending on whether resistant pathogen strains exist in the population and  
65 the likelihood of developing resistance, amongst other factors (*Brent and Hollomon, 2007*). In prac-  
66 tice fungicide mixtures often contain two fungicides that are high-risk for development of resis-  
67 tance. These mixtures are of increasing relevance since there are few low-risk fungicides available  
68 and the high risk options are typically of higher efficacy (*van den Bosch et al., 2014b*). Further, low-  
69 risk (multi-site) fungicides are increasingly rare; for example chlorothalonil has been banned for  
70 use by the EU due to environmental concerns since 2019 (*Murray, 2019*). Previous modelling stud-  
71 ies have found fungicide mixtures to be more effective as a resistance management strategy than  
72 alternating use of fungicides (*Elderfield et al., 2018*) or spatially concurrent applications (*Hobbelen*  
73 *et al., 2013*), where different fields receive treatments from different modes of action. That mix-  
74 tures outperformed alternations or concurrent use was robust to fitness costs, partial resistance,  
75 changes in fungicide parameters and the initial frequency of the double resistant strain. For this  
76 reason we concentrate exclusively here on the optimal strategy for mixtures of two high-risk fungi-  
77 cides and seek to test how to optimally construct high-risk fungicide mixtures if current levels of  
78 resistance to the two mixing partners differ, or if between-season pathogen sexual reproduction  
79 is considered.

80 It was reported by *van den Bosch et al. (2014b)* that, across 17 publications, mixtures of high-  
81 risk fungicides resulted in a reduction in selection for resistance in 20 out of 24 pathogen-crop-  
82 fungicide combinations. There is ongoing debate about how high-risk mixtures (i.e. mixtures of

83 high risk fungicides) should be constructed. Although the so-called ‘governing principles’ (*van den*  
84 *Bosch et al., 2014a*) suggest that increased fungicide dose increases selection for a given mode of  
85 action, increased dose of a mixing partner can reduce selection for the other mode of action in the  
86 mixture (*van den Bosch et al., 2014b*). Modelling work shows that the optimal way to mix a low-  
87 risk and a high-risk fungicide is to use the maximum dose of the low-risk chemical and the minimal  
88 viable dose of the high-risk chemical (*Hobbelen et al., 2011a; Elderfield et al., 2018*). However,  
89 maximising the dose of either fungicide when the mixture contains two high-risk chemicals could  
90 lead to excessive selection pressure on that fungicide, so different recommendations are required.

91 *Hobbelen et al. (2013)* use modelling to address the case where the fungicide mixture contains  
92 two high-risk chemicals. They consider four pathogen strains: one that is resistant to both chemi-  
93 cals; one that is sensitive to both; and two more that are sensitive to one fungicide but resistant to  
94 the other. Their results suggest that the choice of doses used is crucial to the resulting durability of  
95 the strategy. *Hobbelen et al. (2013)* suggest the optimal fungicide mixture has a dose pairing that  
96 is as weak as possible whilst achieving sufficient yield, and selects equally for both single resistant  
97 strains. These authors addressed the case where both single resistant strains are initially at the  
98 same frequency, and explored what happens for different amounts of the double resistant strain.  
99 However, that study did not address the common real-world scenario where the initial levels of re-  
100 sistance to the two chemicals differ. The optimal strategy in this case is not yet described and – as  
101 well as the effect of sexual reproduction – is the focus of this paper. In this work we introduce and  
102 test a new prescription based on equalising the resistance frequencies by the time of breakdown,  
103 rather than equalising selection in the first year.

104 Initial levels of resistance commonly differ for different fungicides due to differing natural inci-  
105 dences of resistant strains, or because one fungicide was introduced to market much earlier than  
106 its mixing partner. For instance, resistance to benzimidazoles developed rapidly in the mid-1980s  
107 (*Blake et al., 2018*), but resistance to Quinone outside Inhibitors (QoI) fungicides was not detected  
108 in the UK until 2001 (*Cheval et al., 2017*). Benzimidazoles were introduced in the 1960s, but QoIs  
109 were not introduced until the 1990s (*Leadbeater, 2014*), suggesting levels of resistance and rate of  
110 increase of resistance differed greatly between these fungicide classes. Fungicide sensitivity has  
111 been reported to differ for high-risk methyl benzimidazole carbamate (MBC) fungicides depending  
112 on year and region, with sensitive proportions of *Oculimacula acuformis* (eyespot disease of cere-  
113 als) comprising 92% in Germany in 1985, but only 4% and 16% in France and the UK respectively in

114 the same year (*Parnell et al., 2008*). Differing resistance frequencies in *Botrytis cinerea* (gray mould  
115 of raspberries) to seven different fungicides from a variety of fungicide classes were reported in  
116 Northern Germany (*Rupp et al., 2017*). Further, initial resistance frequencies may be influenced by  
117 mutation-selection balance (*van den Bosch and Gilligan, 2008*) which depends on the fitness costs  
118 of resistance, which will depend on the mutation, and hence the fungicide.

119 Fungicides can be described by 'dose-response curves' which are measures of their efficacy.  
120 These curves differ depending on the mode of action and effectiveness of each chemical. We seek  
121 to show how different dose-response parameters influence the optimal strategy even when levels  
122 of resistance to the two fungicides vary and/or pathogen sexual reproduction is present. Under-  
123 standing the effect of different dose response curves on the optimal strategy is crucial to decision  
124 making when constructing mixtures containing pairs of existing fungicides and/or new chemicals  
125 that come on to the market. These decisions are made by agronomists and growers but typically  
126 informed by recommendations from the Fungicide Resistance Action Committee (FRAC).

127 In this paper we address the following questions:

- 128 1. What is the effect of varying initial levels of resistance on optimal resistance management  
129 strategies for mixtures of pairs of high risk fungicides?
- 130 2. When do existing strategy recommendations fail, and how can we improve upon them?
- 131 3. How robust is our new recommendation to alterations in parameters controlling pathogen  
132 epidemiology and fungicide efficacy?
- 133 4. What is the effect of the balance of between-season sexual and asexual reproduction on the  
134 model and the strategy recommendation?

## 135 **Methods**

136 The model is an adapted version of one presented by *Hobbelen et al. (2013)*, which addresses two  
137 high-risk fungicides used together to control Septoria. The model is compartment-based and mea-  
138 sures different categories of leaf tissue (Figure 2). After infection, healthy (susceptible) tissue ( $S$ )  
139 transitions to exposed tissue ( $E$ ) (infected but not infectious) and then to infectious tissue ( $I$ ), be-  
140 fore removal ( $R$ ) – see Figure 2. The initial infection is given by a primary inoculum ( $P$ ). The model  
141 also includes growth and senescence of living tissue. The model also tracks the active concentra-  
142 tion of both fungicides in the mixture over time. We split the modelled year into two distinct time  
143 periods – within and between growing seasons. A full list of model parameters and values (values

144 taken from *Hobbelen et al. (2013)*) is provided in Table 1.

145 We generalise the model presented by *Hobbelen et al. (2013)* by introducing between-season  
146 sexual reproduction, because *Septoria*'s sexual ascospores are reported to contribute to a large  
147 proportion of the primary inoculum that initialises each epidemic (*Eriksen et al., 2001; Suffert et al.,*  
148 *2011*). We denote the proportion of between-season sexual reproduction  $q_B$ , and initially set  $q_B = 0$   
149 in line with *Hobbelen et al. (2013)* before exploring the effect of between-season sexual reproduc-  
150 tion by scanning over a range of values. We neglect within-season sexual reproduction for simplic-  
151 ity and because previous research suggests its effect on epidemic severity is small (*Eriksen et al.,*  
152 *2001*). Another change to the model presented by *Hobbelen et al. (2013)* is that we consider one  
153 field instead of two, since we omit the less effective 'concurrent field' strategy.

### 154 **Pathogen strains**

155 When studying fungicide resistance evolution, modellers often consider an emergence and a se-  
156 lection phase separately (*van den Bosch and Gilligan, 2008; Milgroom, 1990; van den Bosch et al.,*  
157 *2011*). The former concerns the initial stochastic phase where new resistant strains appear through  
158 random mutation and invasion. We do not account for the emergence phase, and focus entirely  
159 on the selection phase, which is where the resistant strain is already established in the population,  
160 and a selection pressure is applied when fungicide treatments are used.

161 We label the two fungicides *A* and *B*. It is assumed that there are four pathogen strains; the dou-  
162 ble sensitive strain, two single resistant strains and the double resistant strain. These are denoted  
163 by *ss*, *sr*, *rs* and *rr* respectively, where *r* indicates resistant and *s* indicates sensitive to fungicide *A* or  
164 *B* (for example the labelling *rs* would correspond to a pathogen strain that is resistant to fungicide  
165 *A* but sensitive to fungicide *B*).

166 **Within-season**

167 Within-season model equations

168 The within-season model dynamics are as follows:

$$\frac{dS(t)}{dt} = g(A) - \Gamma(t)S(t) - \frac{\beta S(t)}{A(t)} \sum_{mn \in \{rr, sr, rs, ss\}} \delta_{A,m}(C_A) \delta_{B,n}(C_B) (I_{mn}(t) + P_{mn}(t)), \quad (1)$$

$$\begin{aligned} \frac{dE_{mn}(t)}{dt} = & \frac{\beta S(t)}{A(t)} \delta_{A,m}(C_A) \delta_{B,n}(C_B) (I_{mn}(t) + P_{mn}(t)) - \Gamma(t)E_{mn}(t) \\ & - \gamma \delta_{A,m}(C_A) \delta_{B,n}(C_B) E_{mn}(t) \end{aligned} \quad \text{for } mn \in \{rr, sr, rs, ss\}, \quad (2)$$

$$\frac{dI_{mn}(t)}{dt} = \gamma \delta_{A,m}(C_A) \delta_{B,n}(C_B) E_{mn}(t) - \mu I_{mn}(t) \quad \text{for } mn \in \{rr, sr, rs, ss\}, \quad (3)$$

$$\frac{dR(t)}{dt} = \Gamma(t) \left[ S(t) + \sum_{mn \in \{rr, sr, rs, ss\}} E_{mn}(t) \right] + \mu \sum_{mn \in \{rr, sr, rs, ss\}} I_{mn}(t). \quad (4)$$

169 See Table 1 for parameter, variable and function definitions. Note that the notation  $mn \in$   
 170  $\{rr, sr, rs, ss\}$  means that we actually have 4 equations for  $E_{mn}(t)$  and for  $I_{mn}(t)$ , each corresponding  
 171 to one of the pathogen strains  $rr, sr, rs, ss$ . In the absence of fungicide treatment, infection occurs  
 172 with infection rate  $\beta$ , with latent rate  $\gamma$  (transition from latent infection to symptomatic infection)  
 173 and removal rate  $\mu$  (transition from symptomatic to removed).

**Table 1.** Parameters and state variables used in the HRHR model. Sources: *Hobbelen et al. (2013)*; *Elderfield et al. (2018)*. Although the default value for the proportion of between-season sexual reproduction ( $q_B$ ) is 0, we test different values to explore the effect of this parameter on the results of the model. The value of  $\psi_0$  is changed by the non-dimensionalisation process, and the function  $g$  used by *Hobbelen et al. (2013)* was  $r(k - A)$  for  $k = 4.2$ , not  $r(1 - A)$ . All other parameter values are unchanged by this process. This explains why the tissue state variables (and some of the other parameters) have no units in our version of the underlying model.

| Symbol              | Meaning                                                   | Type      | Default value/range/equation | Units                     |
|---------------------|-----------------------------------------------------------|-----------|------------------------------|---------------------------|
| $S(t)$              | Susceptible tissue                                        | Variable  | [0, 1]                       | -                         |
| $E_{mn}(t)$         | Latently infected (exposed) tissue, strain $mn$           | Variable  | [0, 1]                       | -                         |
| $I_{mn}(t)$         | Infectious tissue, strain $mn$                            | Variable  | [0, 1]                       | -                         |
| $R(t)$              | Removed tissue                                            | Variable  | [0, 1]                       | -                         |
| $A(t)$              | Total tissue ( $= S + R + \sum_{m,n} [E_{mn} + I_{mn}]$ ) | Variable  | [0, 1]                       | -                         |
| $P_{mn}(t)$         | Primary inoculum, strain $mn$                             | Variable  | $[0, \psi_0]$                | -                         |
| $C_i(t)$            | Fungicide $i$ concentration                               | Variable  | $\geq 0$                     | Label dose (fraction of)  |
| $t$                 | Time                                                      | Variable  | $\geq 0$                     | degree-days               |
| $g(A)$              | Production of host leaf tissue                            | Function  | Equation 7                   | -                         |
| $\Gamma(t)$         | Senescence                                                | Function  | Equation 8                   | -                         |
| $\delta_{F,m}(C_F)$ | Fungicide $F$ growth rate factor, strain $m$              | Function  | Equation 9                   | -                         |
| $r$                 | Host growth rate                                          | Parameter | $1.26 \times 10^{-2}$        | degree-days <sup>-1</sup> |
| $\beta$             | Infection rate                                            | Parameter | $1.56 \times 10^{-2}$        | degree-days <sup>-1</sup> |
| $\gamma^{-1}$       | Latent period                                             | Parameter | 266                          | degree-days               |
| $\mu^{-1}$          | Infectious period                                         | Parameter | 456                          | degree-days               |
| $\psi_0$            | Initial inoculum amount                                   | Parameter | $(1.09/4.2) \times 10^{-2}$  | -                         |
| $\nu$               | Inoculum decay rate                                       | Parameter | $8.5 \times 10^{-3}$         | degree-days <sup>-1</sup> |
| $q_B$               | Between-season sexual reproduction proportion             | Parameter | 0                            | -                         |
| $\Lambda_F$         | Fungicide $F$ decay rate                                  | Parameter | $1.11 \times 10^{-2}$        | degree-days <sup>-1</sup> |
| $\theta_F$          | Fungicide $F$ curvature                                   | Parameter | 9.6                          | Label dose <sup>-1</sup>  |
| $\omega_F$          | Fungicide $F$ asymptote                                   | Parameter | 1                            | -                         |
| $T_{emerge}$        | Start of modelled season                                  | Parameter | 1212                         | degree-days               |
| $T_{GS32}$          | First treatment time                                      | Parameter | 1456                         | degree-days               |
| $T_{GS39}$          | Second treatment time                                     | Parameter | 1700                         | degree-days               |
| $T_{GS61}$          | Senescence begins                                         | Parameter | 2066                         | degree-days               |
| $T_{GS87}$          | End of season                                             | Parameter | 2900                         | degree-days               |



174 Primary infection

175 The modelled season starts at  $T_{emerge}$  (Table 1), which corresponds to the emergence of 'leaf five'  
176 (*Elderfield et al., 2018; van den Berg et al., 2013*), rather than the start of the growing season.  
177 The dynamics between the start of the growing season and  $T_{emerge}$  are approximated by the initial  
178 conditions which are used to subsume both the primary infection and the initial dynamics at the  
179 start of the season (*Elderfield et al., 2018*).

180 The initial infection comes from a primary inoculum  $P_{mn}$  for strain  $mn \in \{rr, rs, sr, ss\}$ . This in-  
181 oculum is assumed to decay exponentially, at the same rate  $\nu$  for all strains. In fact, aside from  
182 the effect of the fungicide application, the strains are treated as identical. In particular, this as-  
183 sumes no fitness cost to the presence of fungicide resistance. Letting  $t$  be the time since the start  
184 of the season (measured in degree-days) and  $P_{mn,0}$  be the initial amount of inoculum for strain  
185  $mn \in \{rr, rs, sr, ss\}$ :

$$P_{mn}(t) = P_{mn,0} \exp(-\nu t). \quad (5)$$

186 Host growth

187 We define the total amount of tissue

$$A = S + E_{ss} + E_{rs} + E_{sr} + E_{rr} + I_{ss} + I_{rs} + I_{sr} + I_{rr} + R. \quad (6)$$

188 The growth of the wheat crop is given by the following function:

$$g(A) = r(1 - A). \quad (7)$$

189 The growth is monomolecular (*Cunniffe and Gilligan, 2010*), and includes density dependence  
190 such that the rate of production of host tissue decreases as the total amount of tissue ( $A$ ) increases.  
191 We non-dimensionalised the tissue quantities so that the maximum leaf area after growth finishes  
192 is 1. This differs from the scale used by *Hobbelen et al. (2013)*, where tissue quantities are mea-  
193 sured out of 4.2, the maximum leaf area index (due to vertically stacked leaves). The growth func-  
194 tion is scaled by a growth rate  $r$ .

195 Senescence

196 We use the following senescence function  $\Gamma$ :

$$\Gamma(t) = \begin{cases} 0.005 \left( \frac{t - T_{GS61}}{T_{GS87} - T_{GS61}} \right) + 0.1e^{-0.02(T_{GS87} - t)}, & \text{if } t \geq T_{GS61}, \\ 0, & \text{if } t < T_{GS61}. \end{cases} \quad (8)$$

197 This function is inherited from the models by *Hobbelen et al. (2013)* and *Elderfield et al. (2018)*,  
198 and represents the rapid increase in the senescence of healthy tissue towards the end of the sea-  
199 son. Senescence begins at growth stage 61,  $t = T_{GS61}$  (where we use Zadok's growth scale for the  
200 growth of wheat (*Zadoks et al., 1974*)). Senescence is assumed to only affect tissue from the  $S$   
201 and  $E$  compartments, but the disease is assumed to disrupt this process meaning that there is  
202 no senescence of tissue in the  $I$  compartment. By harvesting time at  $t = T_{GS87}$  we get (almost)  
203 complete senescence of the healthy tissue.

204 Effect of fungicides

205 We denote the response of a pathogen strain  $m$  to the application of a fungicide  $F$  by  $\delta_{F,m}(C_F)$ . The  
206 chemical concentration changes depending on the time since the chemical was applied, which  
207 means the pathogen response varies with time (Figure 1D). We assume fungicide applications  
208 occur instantaneously and that the concentration of fungicide decays exponentially (Figure 1C).  
209 Two-treatment fungicide programs were found to balance effective control with resistance man-  
210 agement in *van den Berg et al. (2016)*, so we focus on strategies which have two spray applications  
211 per year. We assume the two fungicide treatments are applied at  $T_{GS32}$  and  $T_{GS39}$  each year (Table  
212 1).

213 The fungicides decrease the rate of the transition of tissue from healthy to exposed ( $\beta$ ), and  
214 from exposed to infected ( $\gamma$ ), corresponding to both protectant and eradicator activity (Equations 1  
215 - 4). Both transition rates are assumed to decrease by the same amount, as in *Hobbelen et al. (2013)*.  
216 The fungicide response  $\delta_{F,s}(C_F)$  lies in the interval  $[0, 1]$ , and multiplies each respective transition  
217 rate (Table 2).

218 For a dose  $C_F$  of a fungicide  $F$ , we use dose responses to sensitive strains (Figure 1A,B) of the  
219 type

$$\delta_{F,s}(C_F) = 1 - \omega_F \left( 1 - e^{-\theta_F C_F} \right), \quad (9)$$

**Table 2.** Effect of fungicides on the pathogen strains in the model. Each value in the interval  $[0, 1]$  multiplies the rate of the transition of tissue from susceptible to exposed ( $\beta$ ) and from exposed to infectious ( $\gamma$ ). This means that the *rr* strain is unaffected by the presence of fungicide (multiplied by 1), whereas the *ss* strain has transition rates reduced by a factor of  $\delta_{A,s}\delta_{B,s} < 1$ . Note that ‘fungicide effect’ and ‘realised effect’ are equivalent, since  $\delta_{A,r} = \delta_{B,r} = 1$ , i.e. resistant strains are assumed to be completely unaffected by an application of fungicide.

| Strain    | Fungicide effect                     | Realised effect                      |
|-----------|--------------------------------------|--------------------------------------|
| <i>rr</i> | $\delta_{A,r}(C_A)\delta_{B,r}(C_B)$ | 1                                    |
| <i>sr</i> | $\delta_{A,s}(C_A)\delta_{B,r}(C_B)$ | $\delta_{A,s}(C_A)$                  |
| <i>rs</i> | $\delta_{A,r}(C_A)\delta_{B,s}(C_B)$ | $\delta_{B,s}(C_B)$                  |
| <i>ss</i> | $\delta_{A,s}(C_A)\delta_{B,s}(C_B)$ | $\delta_{A,s}(C_A)\delta_{B,s}(C_B)$ |

220 where  $\delta_{F,s}(C_F)$  is the effect on any strains sensitive to it. Here  $\omega$  is the maximum effect of the fungi-  
 221 cide and  $\theta$  is a curvature parameter. The curvature parameter  $\theta$  characterises how steeply the  
 222 curve drops, i.e. how sharply the effect on the pathogen depends on the concentration of chem-  
 223 ical (Figure 1A,B). Higher efficacy fungicides have higher values of  $\omega$  and/or  $\theta$ . We predominantly  
 224 focus on dose responses within a similar parameter range to pyraclostrobin, a high risk strobilurin  
 225 fungicide modelled in *Hobbelen et al. (2013)*. We assume that resistant strains are completely un-  
 226 affected by an application of fungicide, in the same way as *Elderfield et al. (2018)*. This means that  
 227  $\delta_{F,r}(C_F) = 1$  for any fungicide  $F$  and concentration  $C_F$ .

228 The net rate of infection for any strain  $mn$  is given by the sum of the rates of primary infections  
 229 and secondary infections. The rate of primary infections is given by  $\delta_{A,m}(C_A)\delta_{B,n}(C_B)P_{mn}(t)$ , and the  
 230 rate of secondary infection is given by  $\delta_{A,m}(C_A)\delta_{B,n}(C_B)I_{mn}(t)$ . Initially primary infection contributes  
 231 highly, but since the primary inoculum decays away exponentially it becomes less important rela-  
 232 tive to secondary infections as the season progresses.

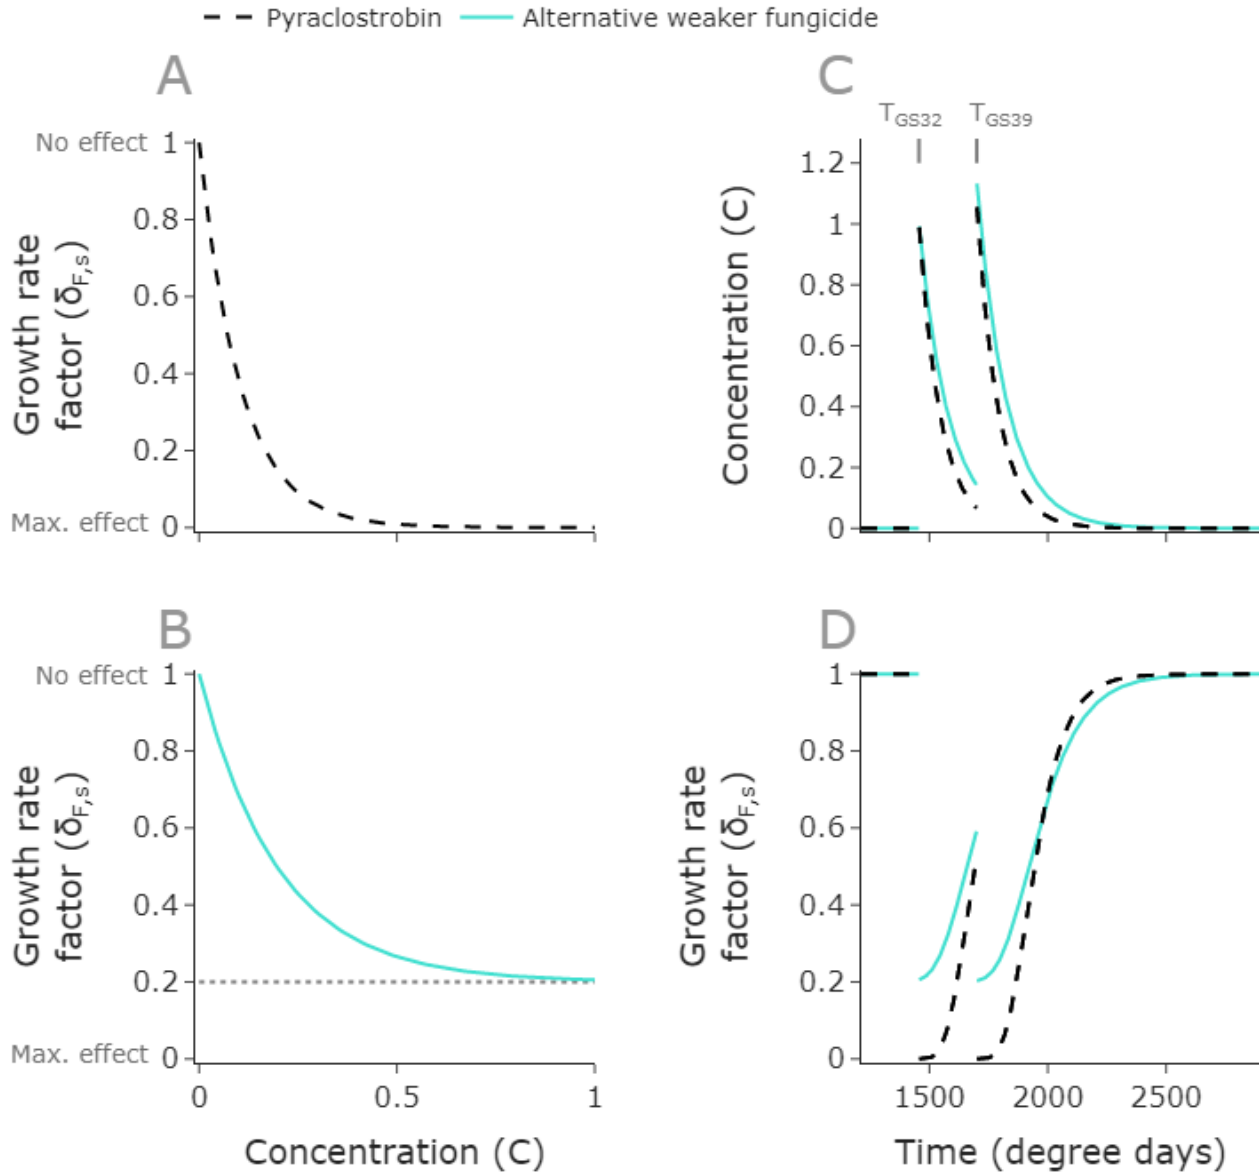

**Figure 1. Fungicide applications limit pathogen growth rates before concentrations decay.** Dose response curves for pyraclostrobin (A) and a weaker but slower decaying alternative fungicide (B). We plot  $\delta_{F,s}(C_F)$ , the multiplier on the growth rate for sensitive strains, so that the growth rate is unchanged ( $\delta_{F,s}(C_F) = 1$ ) when the chemical concentration is 0, but the growth rate approaches 0 as the concentration of pyraclostrobin increases (A). However, the weaker fungicide has a maximum efficacy  $\omega = 0.8$  (B), meaning that the growth multiplier approaches 0.2 (dotted line) at high concentrations. The concentration depends on time since application (C), starting at 0 at the beginning of the modelled season (1212 degree days as in *Elderfield et al. (2018)*) and increasing instantaneously at  $t = 1456$  and  $t = 1700$  when the doses are applied, before exponentially decaying with rates that differ here for the two fungicides. The effect of the fungicides correspondingly vary with time since the first spray (D). We model scenarios in which two sprays are applied, and here a full dose of both fungicides is applied.

**Parameter values:** pyraclostrobin:  $(\omega, \theta, \Lambda) = (1, 9.6, 1.11 \times 10^{-2})$ ; weaker alternative fungicide:  $(\omega, \theta, \Lambda) = (0.8, 7, 8 \times 10^{-3})$ . Pyraclostrobin parameterisation is as in *Hobbelen et al. (2013)*.

### 233 Between-season dynamics

234 Any remaining primary inoculum from the previous winter is assumed to have decayed entirely

235 by the end of the growing season. We assume a constant total initial amount of inoculum in each

236 season (denoted  $\psi_0$ ), as is used by *Hobbelen et al. (2013)*; *Elderfield et al. (2018)*.

237 We keep the proportion of between-season sexual reproduction as a free parameter ( $q_B$ ). Then  
 238 the remaining proportion  $1 - q_B$  of the initial population is assumed to be clonal offspring. Initially  
 239 we consider  $q_B = 0$  as in *Hobbelen et al. (2013)*; *Elderfield et al. (2018)*. We later scan over all  
 240 possible values of  $q_B$  to demonstrate the effect of alternative parameter choices.

241 We denote the proportion of offspring of strain  $mn$  as  $X_{mn}$ ,  $Y_{mn}$  for the asexual and sexual cases  
 242 respectively. The calculation of these quantities is described below. The levels of primary inoculum  
 243 at the start of the next season are given by:

$$P_{rr} = \psi_0 \left( (1 - q_B)X_{rr} + q_B Y_{rr} \right), \quad (10)$$

$$P_{rs} = \psi_0 \left( (1 - q_B)X_{rs} + q_B Y_{rs} \right), \quad (11)$$

$$P_{sr} = \psi_0 \left( (1 - q_B)X_{sr} + q_B Y_{sr} \right), \quad (12)$$

$$P_{ss} = \psi_0 \left( (1 - q_B)X_{ss} + q_B Y_{ss} \right). \quad (13)$$

244 Let  $I_{mn}^*$  be the level of infection for strain  $mn$  at the end of the previous modelled season. We  
 245 assume that the fractions of each pathogen strain at the start of a season are calculated based  
 246 only on the fractions of infectious tissue infected by each strain at the previous season's end, as in  
 247 *Hobbelen et al. (2011a)*. We also define the sum of all disease strains:

$$I_{TOT}^* = \sum_{m,n} I_{mn}^*. \quad (14)$$

248 We may also define  $F_{mn}$ , the frequency of strain  $mn$  as a proportion of total disease:

$$F_{rr} = \frac{I_{rr}^*}{I_{TOT}^*}; \quad F_{rs} = \frac{I_{rs}^*}{I_{TOT}^*}; \quad F_{sr} = \frac{I_{sr}^*}{I_{TOT}^*}; \quad F_{ss} = \frac{I_{ss}^*}{I_{TOT}^*}. \quad (15)$$

249 The proportions of asexual offspring,  $X_{mn}$ , are simply given by:

$$X_{rr} = F_{rr}; \quad X_{rs} = F_{rs}; \quad X_{sr} = F_{sr}; \quad X_{ss} = F_{ss}. \quad (16)$$

250 For the sexual offspring  $Y_{mn}$ , we assume perfect random mating of unlinked resistance genes in  
 251 a haploid population, which leads to frequencies as in *Felsenstein (1965)*. The unlinked assumption  
 252 is valid unless the loci involved are close together on the same chromosome. A full derivation of  
 253 these frequencies is given in Supplementary Text 1.

254 Now defining

$$D = F_{ss}F_{rr} - F_{sr}F_{rs}, \quad (17)$$

255 we obtain:

$$Y_{rr} = F_{rr} - \frac{1}{2}D, \quad (18)$$

$$Y_{rs} = F_{rs} + \frac{1}{2}D, \quad (19)$$

$$Y_{sr} = F_{sr} + \frac{1}{2}D, \quad (20)$$

$$Y_{ss} = F_{ss} - \frac{1}{2}D. \quad (21)$$

256 Combining the results for  $X_{mn}$  and  $Y_{mn}$  leads to the following result:

$$P_{rr} = \psi_0 \left( F_{rr} - \frac{1}{2}q_B D \right), \quad (22)$$

$$P_{rs} = \psi_0 \left( F_{rs} + \frac{1}{2}q_B D \right), \quad (23)$$

$$P_{sr} = \psi_0 \left( F_{sr} + \frac{1}{2}q_B D \right), \quad (24)$$

$$P_{ss} = \psi_0 \left( F_{ss} - \frac{1}{2}q_B D \right). \quad (25)$$

257 Note that the sum of these values gives  $\psi_0$ , the total initial amount of inoculum.

## 258 Measures of strategy performance

259 Effective life

260 Following *Hobbelen et al. (2013, 2011a)*, we use the term *effective life* to denote the number of years  
261 for which a fungicide or fungicide application strategy is effective, meaning growers achieve yields  
262 above a certain threshold, which we set at 95% of the disease-free yield (*Hobbelen et al., 2013*).  
263 We assume that a grower requires a yield above this threshold for economic reasons. We will use  
264 effective life to assess the effectiveness of the fungicide mixtures we test.

265 Selection ratio

266 Again following *Hobbelen et al. (2011b)*, we use the term *selection ratio* as a measure of how strongly  
267 a particular strategy results in selection for the resistant strain. They define the selection ratio in  
268 terms of the frequency of the resistant strain before the first spray and at the end of the growing  
269 season. We generalise this form to apply to any of our four pathogen strains, so that in any year

270  $N$  we use:

$$SR_{mn,N} = \Phi_{mn,N,end} / \Phi_{mn,N,start}. \quad (26)$$

271 Here  $\Phi_{mn}$  represents the density of strain  $mn$  as a proportion of total disease, at the start or end  
272 of the season. If the selection ratio for a fungicide is greater than 1 then the pathogen strain has  
273 increased in frequency in year  $N$ .

274 **Example simulation**

275 During the season, susceptible host tissue increases in density initially before natural senescence  
276 later on (Figure 2B,C). The four pathogen strains are affected by the fungicide mixture to different  
277 extents. The fungicide applications cause the exposed tissue (of sensitive strains) to stop increasing  
278 (Figure 2D) and the infectious tissue (of sensitive strains) to decay (Figure 2E). This leads to selection  
279 for resistant strains and a gradual loss in yield over successive seasons due to reduced control of  
280 the pathogen (Figure 2F). The proportions of the pathogen population carrying resistance to either  
281 fungicide increase over successive seasons (Figure 2G). This increase in resistance frequency for  
282 either fungicide (e.g. the strains  $r_s$  and  $r_r$  are resistant to fungicide  $A$ ) is approximately logistic and  
283 is a result of the selection pressure applied. This is characterised by an initially gradual change in  
284 resistance frequency before a rapid increase (Figure 2G).

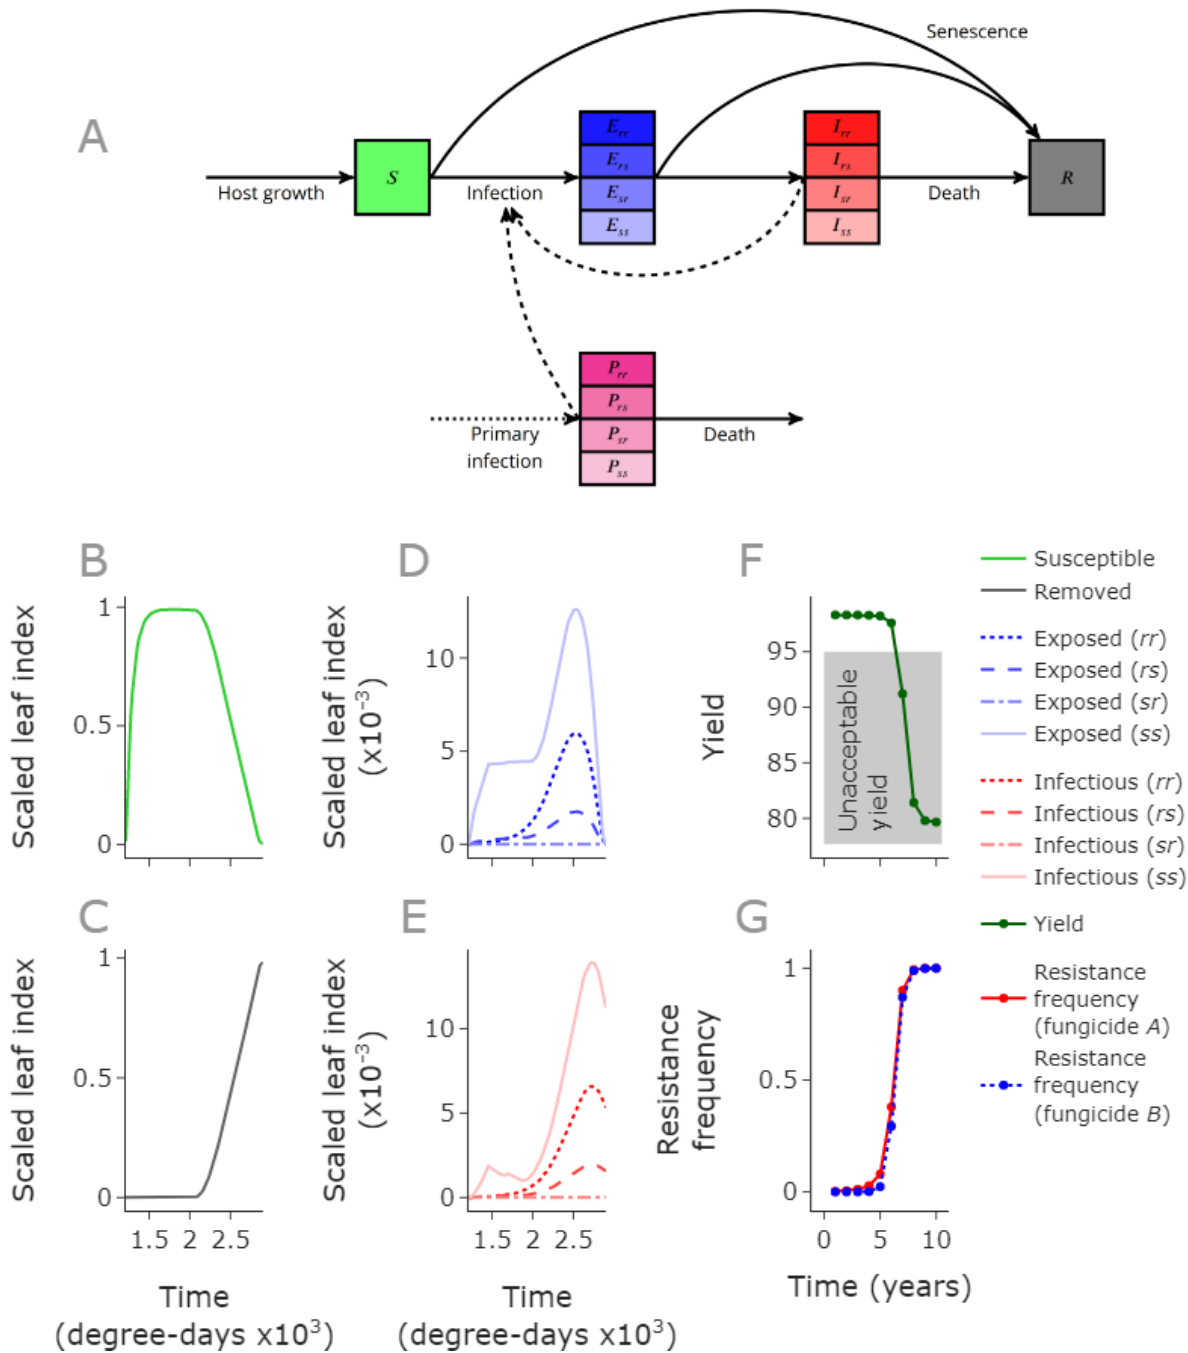

**Figure 2. Selection for resistant strains within each season leads to yield losses over time.** The diagram (A) is a graphical representation of the within-season model. The solid lines represent transitions, the dashed lines effects (for example the amount of infectious tissue affects the rate of infection) and the dotted line represents the instantaneous arrival of primary inoculum ( $P$ ) at the beginning of each season in the model. The pathogen strains are denoted  $ss$ ,  $rs$ ,  $sr$  and  $rr$ , representing the double sensitive, two single-resistant, and the double resistant strain.  $S$ ,  $E$ ,  $I$ ,  $R$  represent tissue categories: susceptible; exposed; infectious; and removed (B,C,D,E). The modelled season begins at 1212 degree-days (emergence of leaf 5), as in *Hobbelen et al. (2013)*, with fungicide applications at  $t = 1456$  and  $t = 1700$ . Over successive seasons, the yield declines to below the ‘unacceptable yield’ threshold (95%, F) as the resistance frequencies increase (G). The resistance frequencies for a fungicide are the proportion of total disease caused by strains resistant to that fungicide (e.g. for fungicide A these are strains  $rs$  and  $rr$ ).

**Parameter values:** default values as used by *Hobbelen et al. (2013)*, doses: (1, 0.5). Fungicides A and B parameterised to match efficacy of pyraclostrobin. Initial resistance frequencies: ( $rr$ ,  $rs$ ,  $sr$ ) = ( $10^{-8}$ ,  $10^{-3}$ ,  $10^{-6}$ ) – note that these are slightly higher than the default values used in later figures. The disease progress curves are for the 5th growing season. Choosing higher resistance frequencies and a later growing season means the resistant strains are sufficiently high in density to be visible on the same scale as the sensitive strain.



## 285 Results

### 286 Finding an optimal high-risk mixture strategy

287 We seek the optimal dose-pairing to minimise selection for resistant strains and prolong the effec-  
288 tiveness of the mixture while providing sufficient disease control to be economic. We restrict our  
289 search to fixed-dose strategies; those strategies for which each year the same dose choices are  
290 used, although the dose of fungicide *A* and of fungicide *B* may differ to each other in the mixture.

291 Previous work on high-risk fungicide mixtures has neglected the scenario where frequencies  
292 of the single resistant strains differ initially. We seek to determine the optimal strategy depending  
293 on these initial conditions, as well as fungicide parameterisation (dose response and decay rate)  
294 and the balance of asexual and sexual pathogen reproduction. Initially we assume that there is no  
295 sexual reproduction in the pathogen population, but we relax this assumption later.

#### 296 Dose space

297 We define 'dose space' as the set of pairs of fungicide doses which take values between 0 and 1,  
298 since we assume a "full dose" of 1 is the maximum dose that would be permitted (Figure 3A,B,C).  
299 This allows us to describe all permissible dose-pairs for our fixed fungicide strategy. Different  
300 choices lead to different effective lives (the number of years for which this strategy gives accept-  
301 able yields). We seek the optimal region within dose space, which is the region containing dose  
302 combinations which lead to the longest effective life for the mixture. This is a region rather than  
303 a single pair of doses, since there may be multiple dose combinations which break down in the  
304 same (optimal) year (Figures 3A, 4A-D).

305 The position and size of the optimal region differs for different initial resistance frequencies,  
306 different fungicide parameters or different proportions of between-season sexual reproduction  
307 (for example the optimal regions in Figure 4A-D all differ). To find the optimal region, we use a  
308 grid of dose choices which discretises both concentrations and considers pairs of doses of each  
309 chemical (labelled fungicide *A* and *B* respectively). This 'brute-force' method allows us to simply  
310 read off which dose combinations are best for a given model parameterisation. This method was  
311 previously used by *Hobbelen et al. (2013)*, although we use a finer grid of 51 as opposed to 11 (i.e.  
312 for each parameterisation we consider  $51^2 = 2601$  rather than  $11^2 = 121$  pairs of doses). We also  
313 seek a more biologically-motivated and general method to characterise the optimal dose region,

314 depending on characterisations of the pathogen and fungicides (initial levels of resistance, mode  
315 of reproduction, decay rates and dose-response curves).

316 Strategies to test

317 We will compare the following candidate strategies:

- 318 • Equal selection in the first year (ESFY),
- 319 • Equal resistance frequencies at breakdown (ERFB).

320 We aim to see how these strategies perform relative to the grid search.

321 Equal selection in the first year

322 When strains are completely resistant to fungicide *A* and *B*, **Hobbelen et al. (2013)** assert that the  
323 most durable strategy exerts an approximately equal selection pressure on both single-resistant  
324 strains. They considered situations where the frequencies of the single resistant strains were equal  
325 initially and show how equal selection in the first growing season gives the best outcome. Therefore  
326 we choose this as our first candidate strategy.

327 To explore this strategy we define a metric  $\Omega_{SFY}$ :

$$\Omega_{SFY} = \frac{SR_{rs,1}}{SR_{rs,1} + SR_{sr,1}}, \quad (27)$$

328 where  $SR_{mn,1}$  is the selection ratio for strain  $mn$  in year 1, as defined in Equation 26. Then  $\Omega_{SFY} =$   
329 0.5 means there is equal selection for both single resistant strains in the first year of chemical  
330 application (Figure 3B), whereas  $\Omega_{SFY} > 0.5$  means there is greater selection for fungicide *A*, and  
331  $\Omega_{SFY} < 0.5$  means there is greater selection for fungicide *B*. There is a curve in dose space defined  
332 by the doses satisfying  $\Omega_{SFY} = 0.5$ . In the equal dose-response, equal initial resistant frequency  
333 case, this contour is the line  $y = x$ , for sufficiently large pairs of doses that we get an acceptable  
334 yield. If the initial resistance frequencies are low enough that density dependent effects have a  
335 negligible effect on selection, the line still falls approximately along  $x = y$  even if the frequencies  
336 differ (Figure 3).

337 Minimal doses (that still achieve sufficient disease control) along the  $\Omega_{SFY} = 0.5$  contour are  
338 equivalent to what was recommended previously (**Hobbelen et al., 2013**). We will explore this  
339 strategy (equal selection in first year, low dose), and generalise it slightly to additionally explore a  
340 strategy which takes any dose along this contour rather than only considering minimal doses (equal  
341 selection in first year). Considering all doses on the contour gives an increased chance of finding

342 good dose combinations, and we are also interested in the relative performance of higher dose  
343 mixtures relative to lower dose mixtures. We define 'low doses' by considering the minimum viable  
344 and maximum permitted so-called 'dose sum' along this contour (we define dose sum as dose of  
345 fungicide *A* + dose of fungicide *B*). Low doses are within the lowest third (arbitrarily chosen) of  
346 dose sums which give acceptable control, a range which depends on the parameterisation.

347 If the initial frequencies of the resistant strains differ – for example for pairs of fungicides that  
348 were introduced to market at different times – the ESFY recommendation sometimes fails to give  
349 the optimal outcome (Figures 3A, 4B,D).

#### 350 Equal resistance frequencies at breakdown

351 We propose an alternative strategy – one that ensures resistance frequencies are equal in the first  
352 year where the yield becomes unacceptable (the 'breakdown year'). This takes into account the  
353 effect of the strategy over its entire course rather than only its first year, and it more effectively  
354 accounts for differing initial levels of resistance to the two fungicides. This strategy performs as  
355 well or better when compared to the ESFY strategy, using the default parameterisation and a range  
356 of initial conditions (Figure 3A,C,D).

357 To explore this strategy, we will define another quantity:  $\Delta_{RFB}$ . This is defined in terms of the  
358 difference between the (logits of the) single resistance frequencies at breakdown:

$$\Delta_{RFB} = \text{logit}(I_{rs}) - \text{logit}(I_{sr}), \quad (28)$$

359 where

$$\text{logit}(x) = \log_{10}\left(\frac{x}{1-x}\right), \quad (29)$$

360 and  $I_{rs}$ ,  $I_{sr}$  are the densities of single resistant strains to fungicides *A* and *B* respectively, measured  
361 at the end of the breakdown year. This quantity informs us about the state of the system in the  
362 breakdown year, and whether our strategy led to a greater degree of resistance to one fungicide  
363 compared to its mixing partner. The quantities  $\Omega_{SFY}$  and  $\Delta_{RFB}$  are conceptually similar, focusing  
364 on the effect of the strategy on the single resistant strains. However  $\Delta_{RFB}$  relates to *resistance*  
365 *frequency* in the *breakdown* year as opposed to *selection* in the *first* year ( $\Omega_{SFY}$ ). We use a different  
366 function involving  $\text{logit}(I_{mn})$  for  $\Delta_{RFB}$  because the densities of the single resistant strains can be as  
367 small as  $10^{-10}$ , so a logit scale is more appropriate, whereas because the selection is calculated in  
368 terms of a ratio, it typically lies between 1 and 10. We choose a logit scale rather than logarithmic  
369 because the growth of each single resistant strain is approximately logistic.

370 If the resistant frequencies are equal in the breakdown year then  $\Delta_{RFB} = 0$ . If there is more  
371 resistance to fungicide *A* than *B*,  $\Delta_{RFB}$  is positive and if there is more resistance to fungicide *B*  
372 than *A* then  $\Delta_{RFB}$  is negative. There is a contour in dose space described by  $\Delta_{RFB} = 0$  (Figure 3A,C).  
373 We will refer to this as the  $\Delta_{RFB}$  contour.

374 For the identical fungicide pair model parameterisation, some points along the  $\Delta_{RFB}$  contour lie  
375 in the optimal region (Figure 3A). For these points, resistance frequencies in the breakdown year  
376 are equal and our strategy is optimal. Note that there are also points along the  $\Delta_{RFB}$  contour that  
377 are not optimal – this is because the strength of the mixture must be carefully chosen according  
378 to the fungicide/pathogen parameters. This process is examined in the wider parameter scan  
379 below. Note that in Figure 3D the optimal mixture strength is slightly higher than the weakest  
380 possible mixture strength. This is because the weakest possible mixture strength gives a yield  
381 in the first year of 95%. Any small increase in resistance then causes strategy failure. A slightly  
382 higher mixture strength achieves sufficiently good control to withstand these small changes in  
383 resistance in the early years, but much higher mixture strengths lead to stronger selection for  
384 resistant strains and hence much poorer resistance management. This trade-off causes the non-  
385 monotonic shape of the ERFB line in Figure 3D, which shows how effective life varies with mixture  
386 strength (parameterised as dose sum). Although *Hobbelen et al. (2013)* suggest that the optimal  
387 choice of dose is just high enough to provide effective control, this result suggests doses slightly  
388 higher than minimal are optimal. This result may have been obscured by the coarser 11 by 11 grid  
389 in dose space in that work.

390 The  $\Delta_{RFB}$  contour is smooth within each effective life region (Figure 3A), but jumps as it moves  
391 into regions with a different effective life (so different breakdown year). This is because the values  
392 of  $\Delta_{RFB}$  are found using the relative amounts of single resistant strains in the breakdown year; in  
393 each different region the breakdown year differs and the relative amounts do not align exactly in  
394 different seasons.

395 If initial resistance frequencies and fungicide parameterisations are the same, this recommen-  
396 dation is equivalent to equal selection in the first year as found in *Hobbelen et al. (2013)* (Figure  
397 4A). However, the ESFY recommendation may not work if the initial resistance frequencies and  
398 fungicide parameterisations are not identical. If the initial resistance levels differ then ERFB may  
399 outperform ESFY (Figure 4B,D). However, we note that if the fungicide parameterisations differ but  
400 the initial resistance levels are the same, then the two strategies are very closely aligned (Figure 4C).

401 This is because if selection is equal every year then resistance frequencies will be equal at break-  
402 down. Density dependent effects mean that equal selection in the first year does not guarantee  
403 equal selection in subsequent years, but this effect is small enough to be ignored in many cases.  
404 Equalising resistance frequencies at breakdown avoids the situation where resistance develops  
405 much faster to one fungicide in the mixture, causing it to become ineffective. That would lead to a  
406 loss of control for that fungicide and a lack of protection offered to its mixing partner, causing the  
407 mixture to fail more quickly than if resistance frequencies are equal at breakdown.

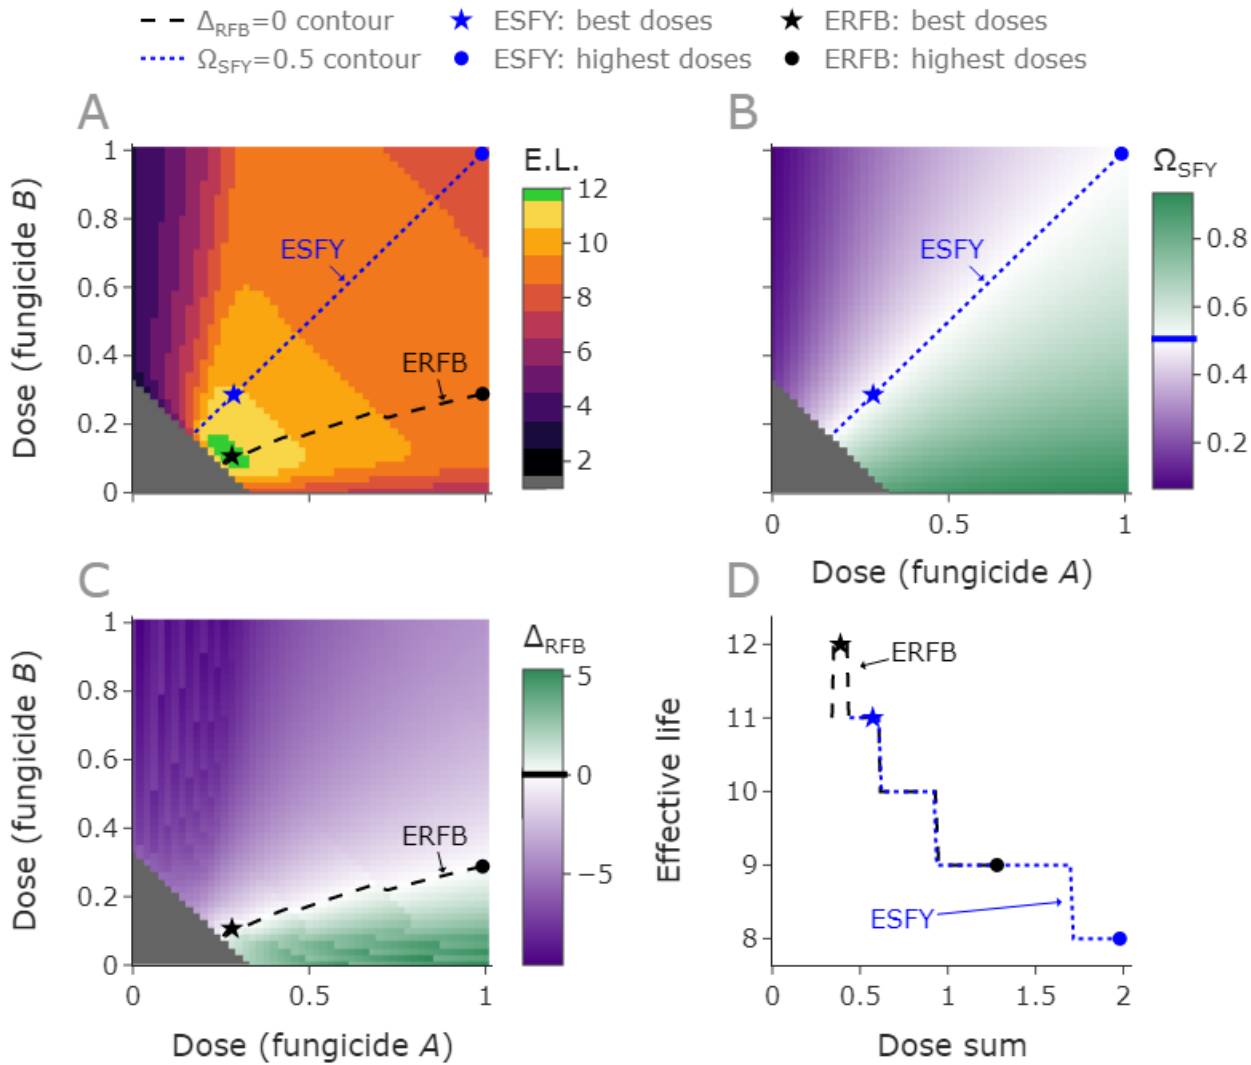

**Figure 3. The equal single resistant frequencies at breakdown strategy is optimal in some cases where equal selection in first year is sub-optimal.** **A, B, C:** ‘Dose space’ for the scenario where the two fungicides are assumed to act with equal efficacy, but the initial levels of resistance are unequal, with greater levels of resistance to fungicide *B* initially. The grey region is doses for which the mixture isn’t sufficiently strong to give acceptable yields even in the first year. The optimal region is the green region with the highest effective life of 12 years (**A**). Examples of the best doses along each contour are denoted by stars, and the highest permissible doses (strongest mixture) are denoted by circles. The dotted blue line represents doses where selection is equal after the first year of treatment (the ESFY strategy). There are no doses along this contour which lie in the optimal region of dose space. This is an example of a case in which the recommendation given by *Hobbelen et al. (2013)* fails. The values of  $\Omega_{SFY}$  in dose space are shown in (**B**). The dashed black line represents those doses which lead to equal resistance frequencies for the two fungicides in the breakdown year (the ERFB strategy). Note that there are doses along this contour which fall in the optimal region (**A**). The  $\Delta_{RFB}$  contour in dose space is shown in (**C**). This strategy reacts much more to differing initial levels of resistance. The effective lives are shown against different values of ‘dose sum’ which is the sum of the doses of fungicide *A* and *B*, as we move along the  $\Omega_{SFY} = 0$  and  $\Delta_{RFB} = 0$  contours (**D**).

**Parameter values:** both fungicides with dose response curves and decay rate parameter as per pyraclostrobin (*Hobbelen et al., 2013*):  $(\theta, \omega, \Lambda) = (9.6, 1, 0.0111)$ , initial resistance frequencies:  $(I_{rs}, I_{sr}, I_{rr}) = (10^{-7}, 10^{-3}, 1.0010009487970706 \times 10^{-10})$ . *Hobbelen et al. (2013)* use default initial values of  $10^{-5}$  for the single resistant strains - we chose values  $10^2$  bigger/smaller than these values.

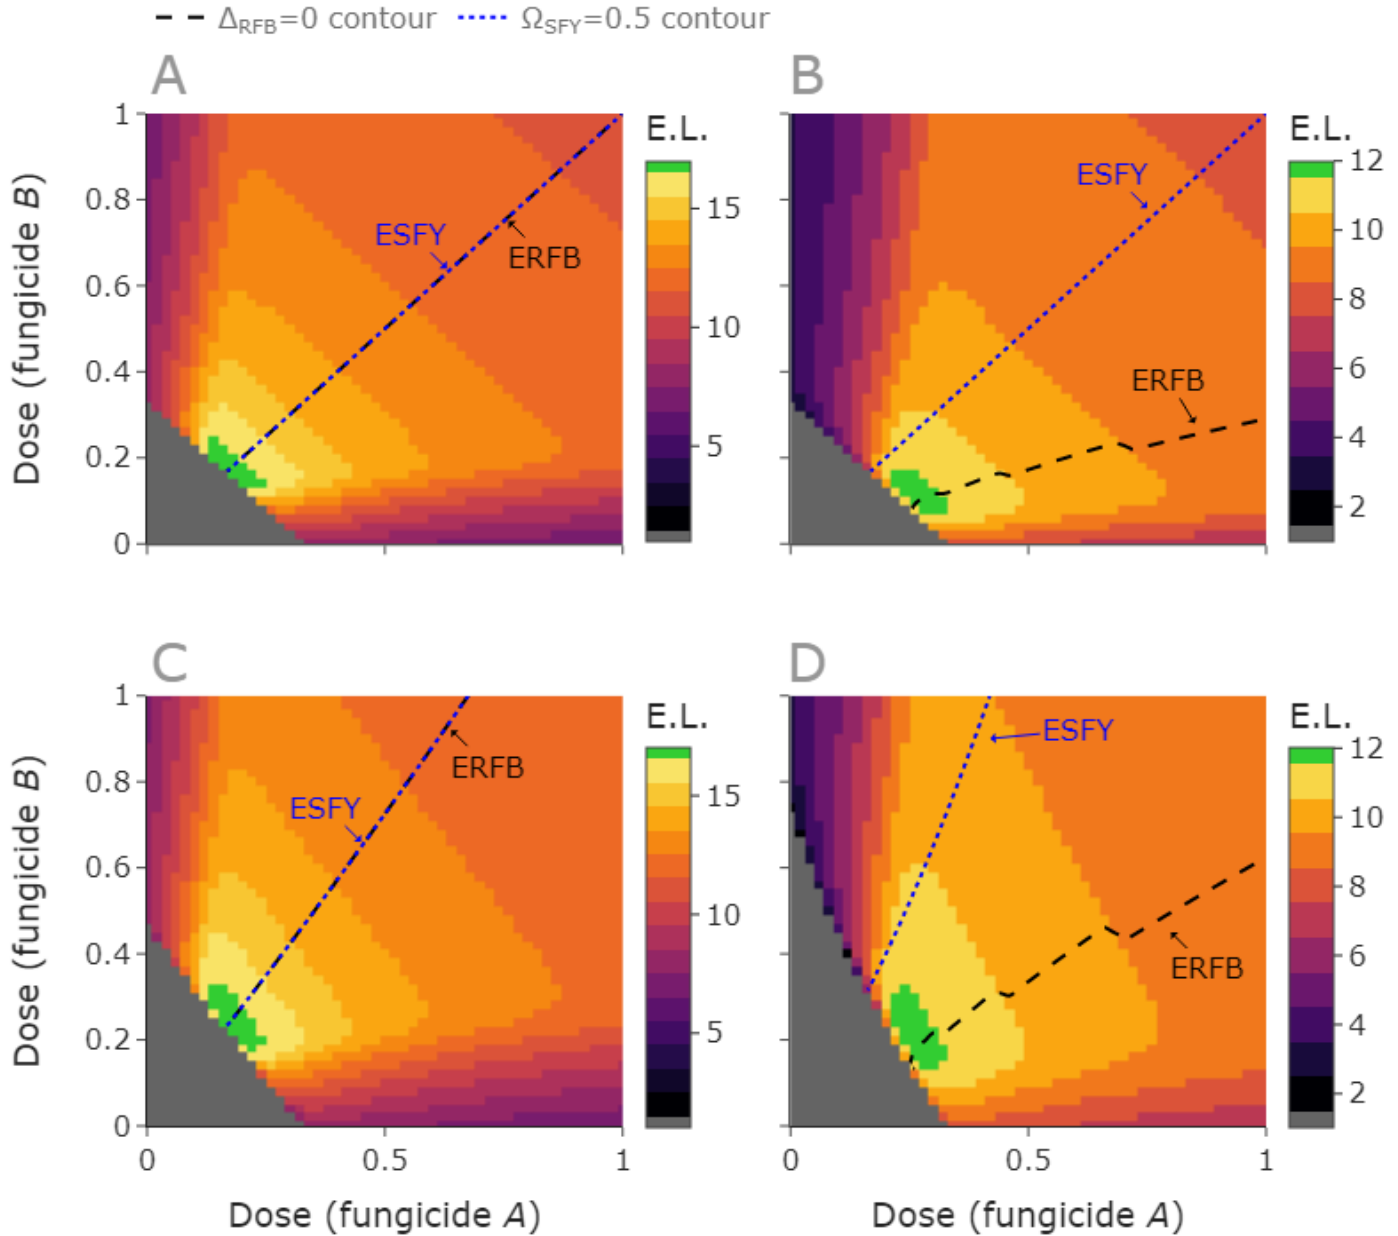

**Figure 4. When does equal resistance at breakdown outperform equal selection in the first year?** When the fungicides have identical dose responses, and the initial (single) resistance frequencies are the same, the ERFB and ESFY strategies are equivalent, and both are optimal (**A**). When the initial frequencies differ, but the fungicide parameterisations are the same, the strategies differ (**B**), as demonstrated by the difference in location of the ERFB and ESFY contours. Here ERFB outperforms ESFY; the ERFB contour passes through the optimal region but the ESFY contour does not. When the fungicide parameterisations differ, but initial (single) resistance frequencies are the same, the ERFB and ESFY strategies are very closely aligned, and both optimal (**C**). When both fungicide parameters and initial (single) resistance frequencies differ, again the strategies differ, but ERFB outperforms ESFY (**D**).

**Parameter values:**

**A,B:** Both fungicides with dose response curves and decay rate parameter as per pyraclostrobin (*Hobbelen et al., 2013*):  $(\theta, \omega, \Lambda) = (9.6, 1, 0.0111)$ .

**C:** fungicide A as per pyraclostrobin, fungicide B:  $(\theta, \omega, \Lambda) = (7.5, 0.95, 0.0111)$ .

**D:** fungicide A as per pyraclostrobin, fungicide B:  $(\theta, \omega, \Lambda) = (7, 0.8, 0.0111)$ .

**A,C:** Equal initial single RFs;  $(I_{rs}, I_{sr}, I_{rr}) = (10^{-7}, 10^{-7}, 9.992007221626409 \times 10^{-15})$ .

**B,D:** Different initial single RFs;  $(I_{rs}, I_{sr}, I_{rr}) = (10^{-7}, 10^{-3}, 1.0010009487970706 \times 10^{-10})$ .

**Table 3.** Ranges/values taken by parameters in the scan over values of the between-season sexual reproduction proportion. The range of fungicide decay rates depends on  $\Lambda_0$ , set as  $1.11 \times 10^{-2}$  degree days<sup>-1</sup> as in Table 1. The value of the double resistant strain is fixed such that  $D = 0$  initially, and then we explore what happens when the double resistant strain is at a density much lower or higher ( $10^{-5}$  or  $10^5$  times lower/higher) in each case (see Figure 5). Parameters were independently generated and parameter sets were accepted as long as the yield in the first year at full dose was at least 95% of the disease free yield, so that there was a valid strategy possible.

| Parameter                                   | Symbol      | Range/Value                          | Distribution              |
|---------------------------------------------|-------------|--------------------------------------|---------------------------|
| Pathogen between-season sex proportion      | $q_B$       | [0, 1]                               | Uniform                   |
| Single resistant strain initial frequencies | $I_{mn}(0)$ | $[10^{-8}, 10^{-4}]$                 | Log-uniform               |
| Double resistant strain initial frequencies | $I_{rr}(0)$ | Varied                               | Fixed by $sr, rs$ strains |
| Fungicide decay rates                       | $\Lambda_i$ | $[\frac{1}{3}\Lambda_0, 3\Lambda_0]$ | Uniform                   |
| Fungicide asymptotes                        | $\omega_i$  | [0.4, 1]                             | Uniform                   |
| Fungicide curvatures                        | $\theta_i$  | [4, 12]                              | -                         |

### 408 **The effect of sexual reproduction**

409 We explored the effect of sexual reproduction for a range of initial frequencies and fungicide pa-  
 410 rameterisations, which were selected randomly and independently (Table 3). We tested the max-  
 411 imum effective life from a grid of 21 by 21 doses with 11 different values of  $q_B$  between 0 and 1  
 412 for each set of parameters. Three such examples which demonstrate the possible behaviours are  
 413 shown in Figure 5. We refer to each example as a ‘replicate’.

414 Initially we explored the initial value of the double resistant strain we expect at linkage equilib-  
 415 rium; meaning the initial value satisfied  $I_{rr}I_{ss} = I_{sr}I_{rs}$ . These are the frequencies we would find in  
 416 the absence of selection and if frequencies were combined at random. We also demonstrate the  
 417 effect of increasing  $q_B$  when  $I_{rr}$  was not at linkage equilibrium, which could occur due to stochas-  
 418 ticity or due to selection within a season, in the scenario where between-season reproduction was  
 419 not entirely sexual. We tested two alternative scenarios: (i) low double resistant initial density (ii)  
 420 high double resistant initial density. These were set to be  $10^{-4}$  times lower/ $10^4$  times higher than  
 421 linkage equilibrium respectively. Although these are exaggerated values compared to the varia-  
 422 tion from linkage equilibrium which might be expected in practice, they demonstrate the way the  
 423 between-season reproduction influences the model output (Figure 5).

424 When the initial proportion of double resistant was greater than the value expected from link-  
 425 age equilibrium, higher proportions of sexual reproduction slowed the increase in the double re-  
 426 sistant strain (Figure 5C). The maximum effective life often also increased with higher proportions



427 of sexual reproduction when the initial proportion of double resistant was equal to the linkage  
428 equilibrium value (replicates 2,3 Figure 5B). This increase in effective life is because the sexual  
429 reproduction step reduces the amount of the double resistant if there is already an increased pro-  
430 portion of double resistant strain relative to single resistant strains (see Supplementary Text 2).  
431 This is clear from the equations for between-season reproduction:

$$P_{rr} = F_{rr} - \frac{1}{2}q_B(F_{rr}F_{ss} - F_{sr}F_{rs}) = F_{rr} - \frac{1}{2}q_B D, \quad (30)$$

432 which shows that if  $D = F_{rr}F_{ss} - F_{sr}F_{rs} > 0$ , then the sexual reproduction step will suppress the  
433 double resistant strain.

434 For replicate 1 (Figure 5B), there is no effect on effective life as  $q_B$  varies (Figure 5A,B), because  
435 the suppression of the double resistant strain is offset by an increase in one or both of the single  
436 resistant strains (Supplementary Text 2). Whether the single resistant strains are sufficient to lead  
437 to strategy failure depends on whether the fungicides in the mixture are low efficacy, so that each  
438 mixing partner cannot adequately control the single resistant strain which is sensitive to it.

439 For low initial incidences of the double resistant ( $rr$ ) strain, between-season sexual reproduc-  
440 tion sometimes acts to decrease the effective life (e.g. replicates 2 and 3, Figure 5A). Interestingly,  
441 in replicate 2 there is a non-monotonic response (Figure 5A). This is because any amount of sex-  
442 ual reproduction greatly increases the level of the double resistant strain after the first between-  
443 season sexual reproduction step. After this, higher levels of sexual reproduction tend can slow  
444 the increase in the double resistant strain that was caused by selection, or it can have no effect,  
445 as described above. This behaviour is explored in Supplementary Text 2. As the level of double  
446 resistant strain increases, the effective life observed tends to decrease. For example in replicate 2  
447 it decreases from 16 (Figure 5A) to 8 (Figure 5C) when  $q_B = 0$ .

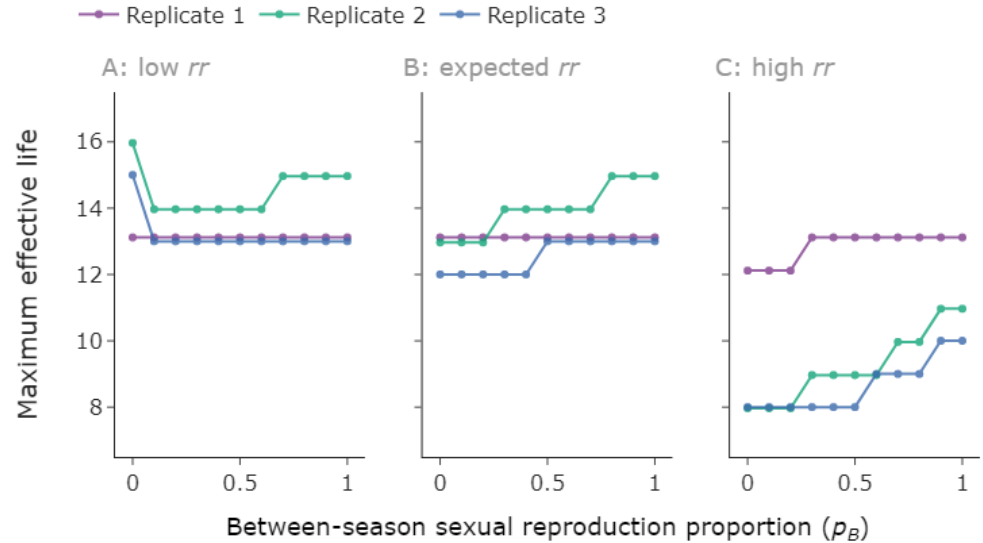

**Figure 5. Effect of sexual reproduction proportion depends on the initial level of the double resistant strain.** We examine three randomly generated replicates (Table 3). For each replicate, we consider three possibilities: low, expected and high double resistant density (**A/B/C**). To avoid the lines overlapping we shifted each replicate vertically by a small amount, but each effective life should be an integer.

**Parameter values:** random fungicide parameter values and single resistant frequencies, generated from distributions described in Table 3. **A:** initial double resistant strain ( $rr$ ) density  $10^{-4}$  times lower than value from linkage equilibrium (VLE); **B:** initial  $rr$  density at VLE; **C:** initial  $rr$  density  $10^4$  times higher than VLE. Values:  $(p_{rr}, p_{rs}, p_{sr}, \Lambda_A, \Lambda_B, \omega_A, \omega_B, \theta_A, \theta_B) =$  **Replicate 1:**  $(7.049916 \times [10^{-19}/10^{-15}/10^{-11}], 5.545997 \times 10^{-7}, 1.269711 \times 10^{-8}, 0.009758, 0.022030, 0.729797, 0.661193, 7.362942, 6.642679)$ ; **Replicate 2:**  $(1.085892 \times [10^{-15}/10^{-11}/10^{-7}], 1.596583 \times 10^{-6}, 6.801290 \times 10^{-6}, 0.007417, 0.009834, 0.574543, 0.706497, 11.143576, 11.170345)$ ; **Replicate 3:**  $(2.445955 \times [10^{-15}/10^{-11}/10^{-7}], 7.155682 \times 10^{-5}, 3.417953 \times 10^{-7}, 0.005803, 0.006279, 0.875035, 0.717337, 8.544356, 11.404773)$ .

448 Previously mixtures were found to outperform alternations in the absence of sexual reproduc-  
 449 tion (Elderfield et al., 2018; Hobbelen et al., 2013). When between-season reproduction is included,  
 450 mixtures still outperformed alternations in every case across 100 tested randomly generated sce-  
 451 narios (Supplementary Text 3).

#### 452 Generalising to different pathogen and fungicide parameterisations

453 We tested the robustness of the observation that there are optimal dose combinations along the  
 454  $\Delta_{RFB}$  contour, and that the ERFB strategy outperforms the ESYF, by testing a wide range of possible  
 455 parameter values. We performed a randomisation scan test across different pathogen and fungi-  
 456 cide parameter values to check whether this recommendation applies in different scenarios, includ-  
 457 ing varying levels of between-season sexual reproduction, initial levels of resistance, and fungicide  
 458 dose-responses and decay rates (Table 4). We have seen that the introduction of between-season  
 459 reproduction can have an effect on the maximum effective life (Figure 5), and seek to show that  
 460 the ERFB strategy is still optimal despite this effect and is robust to different initial conditions and

461 fungicide parameter values.

462 Choice of pathogen parameters

463 The model uses a proportion of between-season sexual reproduction  $q_B$ . In this section we allow  
464  $q_B$  to vary between 0 and 1, since there is no agreed-upon experimental value that we could use.

465 To characterise the pathogen population with respect to the two fungicides, we allow the initial  
466 level of resistant strains to also vary. We independently choose values for the proportion of the  
467 population taken up by the two single resistant strains and for the double resistant strain. The  
468 remaining proportion of the population is the double sensitive strain.

469 Choice of fungicide parameters

470 The fungicides in the model are characterised by three parameters: the decay rate of the chemical;  
471 the curvature parameter; and the asymptote of the dose-response curve. Fungicides with a higher  
472 curvature or asymptote value are more efficacious. Longer decay rates also increase the efficacy  
473 of a fungicide. We vary all three parameters for each fungicide in the scan.

474 Parameter scan process

475 For each simulation in the ensemble, we sampled randomly from independent distributions for  
476 each parameter (Table 4). We repeated 500 times, giving 500 scenarios with different fungicide  
477 and pathogen characteristics as described above. In each case, we compared the best effective life  
478 from the grid to the best ERFB and ESFY outcomes.

479 For each parameter combination, we ran the model over a  $51 \times 51$  grid of dose pairings. We  
480 also found the ERFB and ESFY contours in dose space, and compared the optimal effective life  
481 from doses on these contours to the optimal value from the grid. The ERFB and ESFY contours are  
482 not constrained to lie on the set of pairs of doses we used for our grid, and using only these values  
483 would not necessarily lead to a smooth curve in dose space. Instead we characterised points on  
484 each contour in terms of the total dose applied, which approximately relates to the strength of the  
485 mixture. In particular, we identified a set of lines in dose space along which  $C_B = C_{DS} - C_A$ , where  
486  $C_A, C_B$  are the concentrations of fungicide  $A$  and  $B$ , and  $C_{DS}$  is the so-called 'dose sum' (i.e. dose  
487 of fungicide  $A$  + dose of fungicide  $B$ ). For each such line we used a numerical optimiser to find  
488 the single pair of doses which minimised the squared deviation from the relevant value (0 or 0.5  
489 for  $\Delta_{RFB}$  and  $\Omega_{SFY}$  respectively). The optimiser used was 'minimize' from the open-source Python

**Table 4.** This table shows the ranges/values taken by parameters in the ERFB robustness scan. Table 1 describes the other default parameter values, their sources and their units. The range of fungicide decay rates depends on  $\Lambda_0$ , set as  $1.11 \times 10^{-2}$  degree days<sup>-1</sup> as in Table 1. Certain parameter combinations were excluded to ensure that both ERFB and ESFY were possible, as described in the main text.

| Parameter                                            | Symbol      | Range/Value                          | Distribution |
|------------------------------------------------------|-------------|--------------------------------------|--------------|
| Pathogen between-season sex proportion               | $q_B$       | [0, 1]                               | Uniform      |
| Single resistant pathogen strain initial frequencies | $I_{mn}(0)$ | $[10^{-10}, 10^{-3}]$                | Log-uniform  |
| Double resistant pathogen strain initial frequencies | $I_{rr}(0)$ | $[10^{-15}, 10^{-4}]$                | Log-uniform  |
| Fungicide decay rates                                | $\Lambda_i$ | $[\frac{1}{3}\Lambda_0, 3\Lambda_0]$ | Uniform      |
| Fungicide asymptotes                                 | $\omega_i$  | [0, 1]                               | Uniform      |
| Fungicide curvatures                                 | $\theta_i$  | [0, 12]                              | -            |

490 package ‘scipy.optimize’.

491 This process found this point precisely rather than to the  $\pm 0.02$  that would be obtained using  
 492 the grid. Repeating the process for a total of 100 dose sums  $C_{DS}$  identified a smoothly varying  
 493 contour of pairs of doses precisely along the contour and avoiding the rounding error that would  
 494 have been associated with ‘snapping’ to the grid of points. This meant that when effective lifetimes  
 495 were compared, it was possible for the tested strategies to find a higher, equal or lower optimal  
 496 value compared to the grid.

#### 497 Restriction on parameter space

498 We restricted the parameter scan to only those fungicides for which equal selection in first year and  
 499 equal resistance at breakdown was possible. For certain particularly weak fungicides, the minimum  
 500 dose of the mixing partner (required to attain acceptable yield) was sufficiently large that equal  
 501 selection was not possible, or if initial levels of resistance to the mixing partner were high then the  
 502 mixing partner would always break down first.

503 We excluded any of these problematic parameter combinations by restricting our scan to those  
 504 for which a full dose of either chemical on its own could give sufficient control (> 95%) at least in  
 505 the first year of application. This restriction corresponded to excluding fungicides which were not  
 506 strong enough to provide adequate control if used as a solo product in the first year, and meant  
 507 that the corners (1,0) and (0,1) of dose space correspond to doses that give acceptable control. The  
 508 restriction was sufficient to ensure that both strategies were viable in each scenario tested.

509 Parameter scan results

510 Here we present the results of the parameter scan demonstrating how often the ERFB and ESFY  
511 strategies are optimal for randomly selected parameter values, rather than only showing ERFB  
512 worked when using the default parameter values. We want to establish which parameters affect  
513 the benefit to using ERFB over ESFY, and whether there are any cases where ERFB fails to be optimal.  
514 We find that ERFB is almost always optimal and explore the few cases where it is sub-optimal in  
515 Supplementary Text 5.

516 The ERFB strategy is optimal in 99% of cases (i.e. 495 out of 500). This means there is at least one  
517 point along the  $\Delta_{ERFB}$  contour which gives an effective life at least as good as the optimum effective  
518 life from the grid. The ESFY strategy is less effective, performing optimally in 72% of cases. These  
519 results are summarised in Table 5. There were only 5 cases where ERFB was sub-optimal (by one  
520 year only). These cases are described in Supplementary Text 5. Although there are many cases  
521 where the ESFY strategy performs worse than the ERFB contour, it is usually only one year away  
522 from the optimum, and is at most 5 years from the optimum. There is a single case in which the  
523 ESFY strategy outperformed the ERFB strategy by one year. This case is described in Supplementary  
524 Text 5.

525 There was a relationship between the difference in initial frequencies (on a log scale) and im-  
526 provement in performance from using ERFB instead of ESFY (Figure 6A). This is as expected --  
527 the strategy which takes differences in initial frequencies into account (ERFB) more effectively per-  
528 forms better relative to the other strategy (ESFY) when these differences are larger. There is less of  
529 a clear pattern when looking at the initial values of the double resistant strain, although notably for  
530 very large initial values (greater than  $10^{-5}$ ) there is no difference in strategy performance, since the  
531 double resistant strain dominates and causes the loss of control (Figure 6B). This is because the  
532 improvement of ERFB on ESFY is usually caused by changes in the relative amounts of fungicide *A*  
533 and *B* in the mixture (due to the different positions of the contours). Both fungicide *A* and *B* are  
534 ineffective against the double resistant strain, so changes in the relative amounts of each do not  
535 increase the effective life if the double resistant strain is the dominant cause of loss of control. For  
536 smaller levels of the double resistant frequency, larger differences in performance are sometimes  
537 observed. There is no clear pattern in the performance when looking at differences in the fungicide  
538 asymptote parameter (Figure 6C), which again suggests that the initial frequencies are the most

**Table 5.** This table shows the results of the ERFB robustness parameter scan, which tested 500 different randomly generated scenarios. ‘Cases worked’ is the number/percentage of runs in which the strategy was at least as durable as the optimal strategy from the  $51 \times 51$  grid. ERFB worked in all but 5 exceptional cases which were within one year of the optimum, whereas ESFY (low dose) and ESFY (all doses) both failed to give optimal results in 28% of cases. ERFB worked every time to within one year whereas both ESFY tactics were at least two years from the optimum in over 10% of cases (12.4% for all doses, 12.6% for low doses only). The cases where ERFB was sub-optimal are addressed in Supplementary Text 5.

| Strategy                                    | Cases worked | Cases worked (%) |
|---------------------------------------------|--------------|------------------|
| Equal resistance frequency at breakdown     | 495          | 99%              |
| Equal selection in the first year           | 360          | 72%              |
| Equal selection in the first year, low dose | 360          | 72%              |

**Table 6.** We split the  $\Delta_{RFB}$  contour into 3 depending on the dose sum, splitting evenly into thirds between the minimum and maximum viable values on the contour. Minimum values are determined by the lowest doses to give acceptable yields, and maximum are determined by the largest dose sum such that both doses are less than or equal to 1. Low strength mixtures were optimal in 99% of cases, meaning their effective life was at least as good as the maximum value obtained on the  $51$  by  $51$  grid. There are 5 (i.e. 1% of cases) in which there were ERFB was not optimal (as explained in Supplementary Text 5), so low strength mixtures were optimal in every case in which ERFB was optimal. Note that in some cases there were optimal values in more than one segment of the contour, meaning that these percentages do not sum to 100. In only 3.8% of cases did high strength mixtures perform optimally (and in these cases low doses were also optimal).

| Strategy        | Optimal runs | Optimal runs (%) |
|-----------------|--------------|------------------|
| Low strength    | 495          | 99%              |
| Medium strength | 90           | 18%              |
| High strength   | 19           | 3.8%             |

539 important feature in terms of whether ERFB outperforms ESFY.

540 These results mean we can use the  $\Delta_{RFB}$  contour to conceptually reduce the problem of dose  
541 selection from a two-dimensional problem (choice of two doses) to a one-dimensional problem:  
542 ‘how far along the  $\Delta_{RFB}$  contour is best?’ In other words, we have established that single resistance  
543 frequencies should be equal in the final year, and the only remaining question is: ‘how strong  
544 should the mixture be?’

545 On analysing the parameter scan, we find that whenever the ERFB strategy is successful, low  
546 doses are optimal (Figure 6D/Table 6). To define ‘low doses’ we split the contour into 3 based on the  
547 dose sum between the minimum and maximum *viable dose sums* (acceptable yields and  $\text{dose} \leq 1$ )  
548 along the contour. There are a small number of cases for which high doses perform equally well,  
549 but for the vast majority of points in Figure 6D lower doses are preferable (and in no case are high  
550 doses better).

551 So the optimal strategy when initial resistance frequencies vary is to pick low doses along the

552 equal resistance in breakdown year contour. These doses are often very close to minimal, but  
553 usually fractionally stronger than weakest possible acceptable mixtures. This ensures that small  
554 losses of control due to small increases in resistance are insufficient to push the strategy below  
555 the 95% threshold, as we saw in Figure 3D.

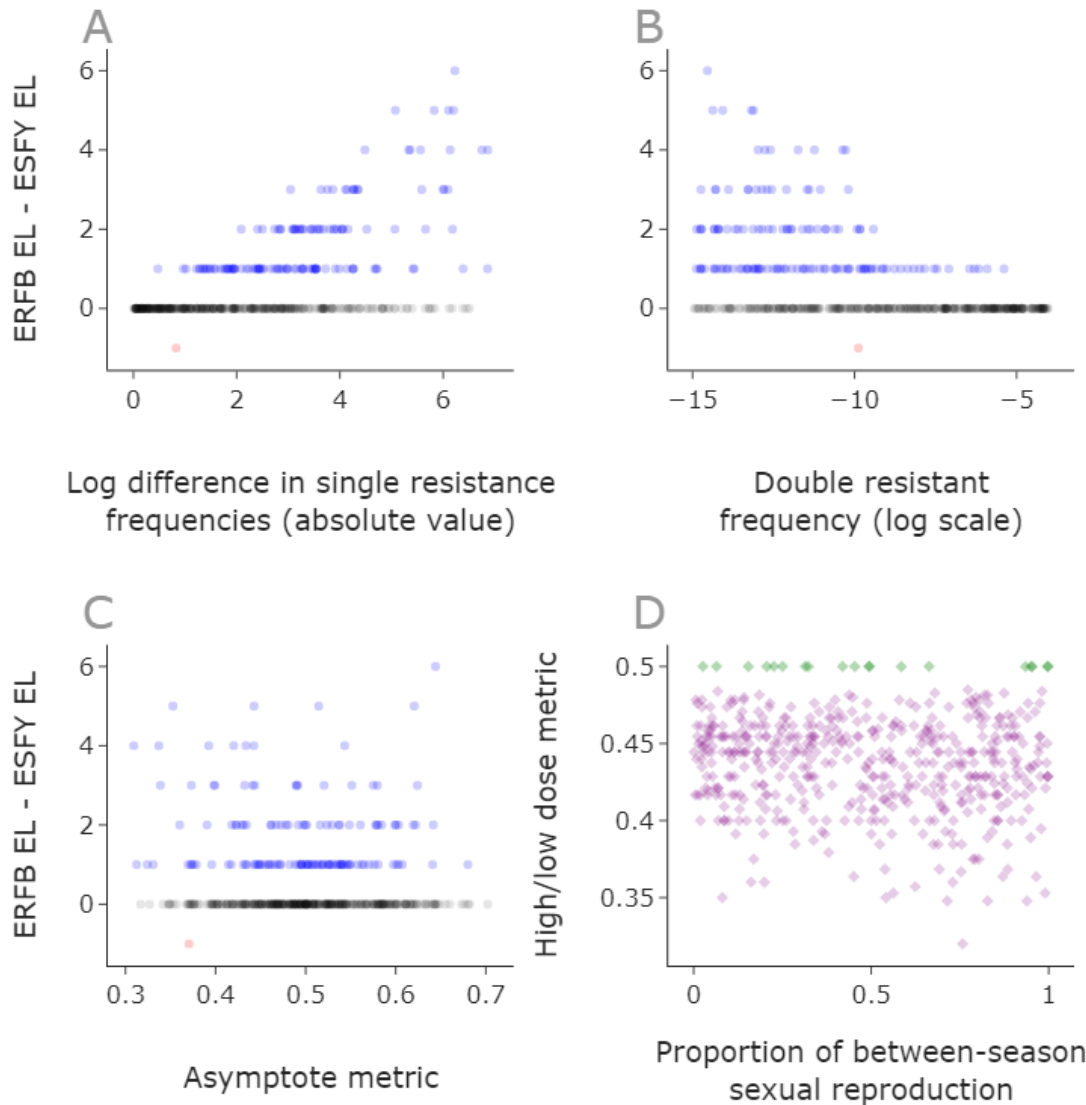

**Figure 6. Initial resistance frequencies drive the improvement in the ERFB strategy over ESFY.** **A,B,C:** we plot the difference between the effective life of the ERFB strategy and the ESFY strategy for each of the 500 scenarios in the parameter scan (Table 4). The equal resistance at breakdown strategy always produces an equal (black) or better (blue) effective life when compared to equal selection in first year (all doses) strategy. The quantity on the x-axis of subplot **A** is the log difference in the single resistance frequencies  $|\log(I_{r,s,0}) - \log(I_{sr,0})|$ . Subplot **B** shows the double resistant frequency on the x-axis, while subplot **C** shows the ‘asymptote metric’,  $\omega_A/(\omega_A + \omega_B)$ , where  $\omega_F$  is the asymptote of the dose-response curve for a fungicide  $F$  (Table 1/Figure 1). Values away from 0.5 indicate greater differences in maximum efficacy for the two fungicides. There is a single case where ESFY outperforms ERFB (red), so that ERFB EL - ESFY EL is negative – this case is explored in Supplementary Text 5.

In the examples tested in the parameter scan, low doses were equal (green) or better (purple) than high doses (**D**). The quantity on the y-axis of subplot **D**, ‘high/low dose metric’ is  $EL_{low}/(EL_{low} + EL_{high})$ , which is the maximum effective life offered by doses on the low or high sections of the ERFB contour.

## 556 Discussion

557 Optimising deployment of fungicides in order to delay spread of fungicide resistant strains remains  
 558 a major challenge (Cunniffe *et al.*, 2015a). Previous work has indicated that optimal mixtures of



559 pairs of fungicides which are both at a high risk of resistance can be constructed by using pairs of  
560 doses which select equally for both single resistant strains in the first year of application (*Hobbelen*  
561 *et al., 2013*). However, we have shown that this recommendation can give sub-optimal results in  
562 the common real-world case in which the initial levels of resistance to the chemicals are not equal  
563 (Figures 3, 4). We have presented an alternative strategy which gave optimal results essentially all  
564 of the time across a broad scan (Tables 4, 5, Figure 6). This was an improvement when compared  
565 to the existing strategy recommendation which was optimal 72% of the time, where we tested a  
566 range of epidemiological and fungicide efficacy parameters, as well as different initial conditions  
567 for the proportion of single- and double-resistant pathogen strains. When the initial single resistant  
568 frequencies differed by at least  $10^{-4}$ , the mean difference in effective life for the strategies was 1.01  
569 years with a range of 0 to 4 years and the mean effective life of the equal resistance frequencies at  
570 breakdown (ERFB) strategy was 10.75 years. The average improvement in this case (as a percentage  
571 of the optimal ERFB effective life) was 7.61% with a range of 0 to 28.57%.

572 The strategy which consistently gave optimal results required doses which make the single re-  
573 sistance frequencies equal in the breakdown year. That means that the levels of resistance to each  
574 fungicide in the mixture are equal in the year that the yield becomes unacceptable due to pathogen  
575 evolution. This concept was shown to work even when fungicide parameters (asymptote, curva-  
576 ture and decay rate) and pathogen parameters (initial frequencies and between-season sexual  
577 reproduction proportion) were varied (Tables 4, 5). The equal resistance frequency at breakdown  
578 strategy can be framed in biological terms rather than the purely mathematical framework relied  
579 on by a naive grid-search method. This leads to the following general and practically applicable  
580 recommendations:

- 581 • reduce doses of fungicides which have higher levels of existing resistance;
- 582 • lower doses are preferable to higher;
- 583 • relatively lower doses of the higher efficacy fungicide in the mixture are preferable;
- 584 • higher efficacy could be in terms of: the decay rate (slower decaying); the curvature (the  
585 effectiveness increases more rapidly with dose); or the asymptote (the maximum level of  
586 control for that chemical).

587 The first point means that equal selection in the first year (ESFY) is only optimal if the initial  
588 resistance levels are sufficiently close, or equal as in *Hobbelen et al. (2013)*. If they differ, the

589 mixture should be adjusted such that selection is weaker for the fungicide with an increased level of  
590 existing resistance, such that the two single-resistant strains reach equal frequency as the mixture  
591 becomes unable to achieve acceptable levels of control. Conversely, in the limit as initial resistance  
592 to one fungicide decreases, its optimal dose increases towards full dose and the dose of the mixing  
593 partner decreases to minimal levels required to give control. This matches the recommendation  
594 given by *Elderfield et al. (2018)* about mixtures of low-risk and high-risk fungicides. Although the  
595 idea of low doses and relatively lower doses of higher efficacy fungicides have been presented  
596 before (*Hobbelen et al., 2013*), they have only previously been tested in the absence of pathogen  
597 sexual reproduction. We have confirmed that these recommendations also apply when there is  
598 between-season sexual reproduction (Figure 6D).

599 The requirement that single resistance frequencies were equal at breakdown defines a curve of  
600 possible dose pairings in dose space (the ERFB contour, see Figures 3, 4). This contour starts from  
601 a minimum viable mixture strength and runs to a maximum viable strength in dose space due to  
602 legal limitations on doses i.e. the point on the contour at which the dose of either fungicide first  
603 reaches 1. The parameter scan showed that low doses along this contour were optimal in virtually  
604 every case (Table 6, Figure 6D). The 5 exceptions are described in Supplementary Text 5 and were  
605 based on an edge effect caused by the 95% yield threshold - meaning that in these cases greater  
606 control was achieved in the final year by higher doses of either fungicide *A* or *B* despite slightly  
607 worse resistance management.

608 The parameter scan results can be extended to a wider range of fungicides than explicitly tested  
609 in the scan. This is because there is a mathematical link between the curvature and dose param-  
610 eters which means two fungicide/dose combinations are equivalent if the curvature multiplied by  
611 chemical concentration is constant. This means that two fungicides with the same asymptote and  
612 decay rate parameters, but different curvatures can be treated as identical with an appropriate  
613 scaling of dose - see also Supplementary Text 4). This means that the ERFB strategy is optimal  
614 across many more choices of the curvature parameters than were explicitly tested in the scan.

615 Although sexual reproduction has a major role in the population genetics of Septoria (*Chen*  
616 *and McDonald, 1996; Singh et al., 2021*), it has been omitted from previous models of fungicide  
617 resistance (*Hobbelen et al., 2013; Elderfield et al., 2018*), justified because Septoria spreads largely  
618 clonally within season. We use the simplest model of sexual reproduction, that mating is fully ran-  
619 dom between unlinked loci and only occurs between seasons. Although loci may be linked for

620 genes which are close together on the same chromosome, resistance of Septoria to some high-  
621 risk fungicide classes is conferred by mutations to genes on different chromosomes, leading to  
622 independent assortment. For example, resistance to methyl benzimidazoles are caused by muta-  
623 tions to chromosome 1 whereas resistance to succinate dehydrogenase inhibitors can be caused  
624 by mutations to chromosome 4, 7 or 8 (*Hartmann et al., 2020*). The proportion of sexual repro-  
625 duction between seasons is assumed to be constant, despite evidence that sexual reproduction  
626 is influenced by density of infection (*Suffert et al., 2018; Eriksen et al., 2001*). We showed that  
627 changing the between-season sexual reproduction proportion had an effect on the maximum ef-  
628 fective life (Table 3, Figure 5). However, we showed that the inclusion of sexual reproduction did  
629 not affect the optimal strategy recommendation for a variety of different values of the proportion  
630 of between-season sexual reproduction (Table 5). Further, the model already normalises for den-  
631 sity each year in the constant inoculum assumption which was used in previous models (*Elderfield*  
632 *et al., 2018; Hobbelen et al., 2013*). Although the model neglects within-season sexual reproduc-  
633 tion, we explored scenarios where all between-season reproduction was sexual, meaning that we  
634 have explored scenarios involving extensive pathogen sexual reproduction. Our results apply to  
635 haploid pathogens, although the situation may be more nuanced in the diploid case. The insect-  
636 icide literature suggests that higher doses of insecticide mixtures can be preferable in tackling  
637 resistance in sexually reproducing diploid pest species, particularly in combination with refugia  
638 (*Andow and Zwahlen, 2006*).

639 The question of mixtures vs alternations is still under debate (*Corkley et al., 2021*), but we  
640 showed that high-risk mixtures outperform alternations when between-season reproduction oc-  
641 curs (Supplementary Text 3), which has previously only been shown in the case without pathogen  
642 sexual reproduction (*Hobbelen et al., 2013*).

643 Although these results apply to the wheat-Septoria pathosystem, they could potentially trans-  
644 fer to other pathosystems that are managed by mixtures of high risk fungicides. Future work may  
645 consider extending these ideas to such pathosystems e.g. grapevine powdery mildew (*Elderfield*  
646 *et al., 2018*) or potato blight (*Pacilly et al., 2018; Cohen and Rubin, 2020*). However, we also note  
647 that past research on mixtures containing a high risk fungicide and a low risk fungicide (*Elderfield*  
648 *et al., 2018*) showed a remarkable consistency of optimal recommendation across pathosystems  
649 and model structures, and we have no reason to believe results would differ for other pathosys-  
650 tems.

651 The same ideas should generalise to mixtures of three or more fungicides - all modes of action  
652 in the mixture would need balancing in a similar manner. However, further work would be required  
653 to confirm this and to explore other strategies possible with more fungicides such as alternations  
654 with three chemicals or varying pairs of two chemicals. Although growers use three-way fungicide  
655 mixtures (*Phelan, 2017*), to the best of our knowledge, no modelling study exists of a mixture of  
656 three or more fungicides as applied to Septoria. Three-way fungicide mixtures were also tested  
657 for their control of *Phytophthora infestans* on tomato or potato and *Plasmopara viticola* on grape  
658 (*Samoucha, 1987*). Combining our results with those of *Elderfield et al. (2018)* would suggest that  
659 a full dose of a low-risk chemical combined with minimal doses along the ERFB contour is likely to  
660 produce the longest effective life for a three-way mixture containing two high-risk fungicides and  
661 one low-risk fungicide (applied to Septoria).

662 In common with all theoretical studies, a number of assumptions were made in the model used  
663 to generate these results. For example, we do not consider spatial effects (*Shaw, 2000; Parnell*  
664 *et al., 2005, 2006*), which could explore how resistance might develop on a regional scale. Man-  
665 agement decisions made by one grower affect the entire community due to dispersal of aerial  
666 inoculum (*Laranjeira et al., 2020*). Future work might address how decisions made by growers can  
667 adversely affect others, and what policy changes can be used to incentivise sustainable behaviour.  
668 A spatially explicit model would also allow reactive disease management to be optimised (*Cunniffe*  
669 *et al., 2015b, 2016*), which would correspond to levels of fungicide treatment depending on local  
670 disease intensity, or even the results of a decision support type system (*Carisse, 2010; Jorgensen*  
671 *et al., 2017; Lázaro et al., 2021*).

672 Emergence of new resistant strains is not considered (*Hobbelen et al., 2014*), nor is partial re-  
673 sistance (*Mikaberidze et al., 2017; Hobbelen et al., 2013*), cross-resistance (*Rehfus et al., 2018*) or  
674 fitness costs (*Mikaberidze et al., 2014; Mikaberidze and McDonald, 2015*). Strong fitness costs to  
675 resistance could prolong effective lives by reducing the overall benefit of carrying resistance. If the  
676 double-resistant strain carried the strongest penalty, we would expect the ERFB strategy to still  
677 hold since the single resistant strains become a relatively greater threat to control (and the ERFB  
678 strategy performs well at managing the single resistant strains). Similarly inclusion of partial re-  
679 sistance would further extend effective lives, since then resistant strains would be suppressed to  
680 some extent by the fungicide. We believe that the ERFB strategy would still hold in this case; future  
681 work would be needed to confirm this.

682 There is no stochasticity in the model, so variation within a growing season and between differ-  
683 ent growing seasons is ignored (*te Beest et al., 2008*), as is precise timing of fungicide applications  
684 (*van den Berg et al., 2013, 2016*). Effects of host plant resistance (*Mikaberidze and McDonald, 2020*;  
685 *Carolan et al., 2017*) and of multiple pathogens (where the crop is infected by e.g. brown rust as  
686 well as Septoria (*Garin et al., 2018*)) are neglected. These various factors potentially have effects on  
687 the strength of mixture required, although different relative dosages of the two fungicides could  
688 still be used to give greater protection to the chemical at most urgent threat.

689 Future work might focus on exploring total lifetime yield (*Elderfield et al., 2018*) or economic  
690 output (*te Beest et al., 2013; van den Bosch et al., 2020*) rather than effective life. The latter would  
691 involve incorporating the price of grain into the calculations, as well as the cost of each fungicide  
692 application and other costs from each year's farming. Using economics rather than effective life  
693 would likely incentivise lower doses in general, and relatively higher doses of cheaper fungicides  
694 if the difference in price relative to efficacy was significant. For instance, if a cheap high efficacy  
695 fungicide were used, lower doses might be best for effective life, but higher doses might lead to  
696 cost savings within an individual year. In a system where grain prices are high, each additional year  
697 of relatively high yield is very valuable, so resistance management becomes the most important  
698 factor. This means economics would probably only change where it is optimal within the small  
699 region of dose space which contains the maximum effective life. In a system where grain prices  
700 were relatively low, then minimising doses of expensive fungicides may become a higher priority  
701 than choosing a strategy which is optimal for resistance management. These factors are impor-  
702 tant when considering policy changes to incentivise sustainable use of fungicide mixtures. Use of  
703 modelling to inform policy change on sustainable agriculture should be informed by agronomic,  
704 environmental, economic, and social considerations (*Mouratiadou et al., 2021*).

705 The breakdown in the final year recommendation may seem less practical than a first year rec-  
706 ommendation, since it may be difficult to predict the future evolution of the pathogen population,  
707 leading to greater uncertainty in the recommendation. However, points in dose space that are  
708 close to the optimal ones usually also have a long effective life (Figure 4). This means that even if  
709 the estimates of the initial resistance frequencies or other parameters are imperfect, a good deci-  
710 sion that is close to the optimal can be made. The model could be used to find the best estimate for  
711 the optimal dose-pairing given imperfect information about the levels of resistance or fungicide pa-  
712 rameters. It can be difficult to estimate the proportion of resistance strains particularly when their

713 incidence is very low (*van den Bosch et al., 2014a*) and there is regional variation (*Garnault et al.,*  
714 *2019*). However, as the resistance frequencies increase and become easier to reliably estimate,  
715 the model output could be updated with an improved estimate for the corresponding optimal  
716 dose combination. As is invariably the case, more complex disease management recommenda-  
717 tions (such as the equal resistance at breakdown recommendation) require good prior knowledge  
718 for good outcomes (*Hyatt-Twynam et al., 2017*).

719 There are some practical criticisms which can be made – for example, growers typically apply  
720 doses in multiples of a quarter of a full dose. This means that a very precise theoretical prescription  
721 for an optimal dose may not be used under current practices. However, our results show that pairs  
722 of fungicides should be used in such a way as to avoid resistance developing too rapidly to either  
723 component of the mixture. This may be achievable to an extent even if we restrict our attention  
724 to multiples of quarter-doses. Further, if modelling shows that using more precise doses would  
725 result in dramatic increases in the durability of a particular fungicide mixture then they should be  
726 recommended.

727 An interesting area for future work would be to consider time varying disease management  
728 strategies. Given that the resistant frequencies vary each year, it may be possible to prolong the  
729 effective lifetime by increasing dose as the level of resistance increases (and the reliability of esti-  
730 mates resistance frequency improves). Further, it would allow other strategies like alternating the  
731 use of mixtures that favour fungicide *A* or *B*, which could outperform strategies that are static in  
732 time. We hope to address these questions in future work. One approach to this would be to use  
733 optimal control theory (*Bussell et al., 2019; Bussell and Cunniffe, 2020, 2022*), another would be to  
734 use dynamic programming (*Bellman, 1952; Onstad and Rabbinge, 1985*).

### 735 **Availability of code online**

736 An implementation of the model in the freely-available programming language Python (Python Soft-  
737 ware Foundation, available at <http://www.python.org>) is online at <https://github.com/nt409/HRHR>.

### 738 **Acknowledgements**

739 NPT acknowledges the Biotechnology and Biological Sciences Research Council of the United King-  
740 dom (BBSRC) for support via a University of Cambridge DTP PhD studentship (Project Reference  
741 2119688). The authors also thank Alexey Mikaberidze, Christopher Gilligan and Julia Davies for

742 useful discussions.

## 743 References

- 744 Agrios, G. (2004). *Plant pathology: fifth edition*, volume 9780080473789. Academic Press.
- 745 Andow, D. A. and Zwahlen, C. (2006). Assessing environmental risks of transgenic plants. *Ecology Letters*, 9:196–  
746 214.
- 747 Bellman, R. (1952). *On the Theory of Dynamic Programming*, volume 38. National Academy of Sciences.
- 748 Blake, J. J., Gosling, P., Fraaije, B. A., Burnett, F. J., Knight, S. M., Kildea, S., and Paveley, N. D. (2018). Changes  
749 in field dose–response curves for demethylation inhibitor (DMI) and quinone outside inhibitor (QoI) fungi-  
750 cides against *Zymoseptoria tritici*, related to laboratory sensitivity phenotyping and genotyping assays. *Pest*  
751 *Management Science*, 74:302–313.
- 752 Brent, K. J. and Hollomon, D. W. (2007). *Fungicide resistance in crop pathogens: how can it be managed?* Fungicide  
753 Resistance Action Committee.
- 754 Bussell, E. H. and Cunniffe, N. J. (2020). Applying optimal control theory to a spatial simulation model of sudden  
755 oak death: ongoing surveillance protects tanoak while conserving biodiversity. *Journal of the Royal Society*  
756 *Interface*, 17.
- 757 Bussell, E. H. and Cunniffe, N. J. (2022). Optimal strategies to protect a sub-population at risk due to an estab-  
758 lished epidemic. *Journal of the Royal Society Interface*, 19.
- 759 Bussell, E. H., Dangerfield, C. E., Gilligan, C. A., and Cunniffe, N. J. (2019). Applying optimal control theory to  
760 complex epidemiological models to inform real-world disease management. *Philosophical Transactions of*  
761 *the Royal Society B*, 374.
- 762 Carisse, O. (2010). *Fungicides*. InTech.
- 763 Carolan, K., Helps, J., Van Den Berg, F., Bain, R., Paveley, N., and Van Den Bosch, F. (2017). Extending the  
764 durability of cultivar resistance by limiting epidemic growth rates. *Proceedings of the Royal Society B: Biological*  
765 *Sciences*, 284.
- 766 Chen, R. S. and McDonald, B. A. (1996). Sexual reproduction plays a major role in the genetic structure of  
767 populations of the fungus *Mycosphaerella graminicola*. *Genetics*, 142:1119–1127.
- 768 Cheval, P., Siah, A., Bomble, M., Popper, A. D., Reignault, P., and Halama, P. (2017). Evolution of QoI resistance  
769 of the wheat pathogen *Zymoseptoria tritici* in Northern France. *Crop Protection*, 92:131–133.
- 770 Cohen, Y. and Rubin, A. E. (2020). A new strategy for durable control of late blight in potato by a single soil  
771 application of an oxathiapiprolin mixture in early season. *PLOS ONE*, 15:e0238148.

- 772 Corkley, I., Fraaije, B., and Hawkins, N. (2021). Fungicide resistance management: maximizing the effective life  
773 of plant protection products. *Plant Pathology*.
- 774 Cunniffe, N. J., Cobb, R. C., Meentemeyer, R. K., Rizzo, D. M., and Gilligan, C. A. (2016). Modeling when, where,  
775 and how to manage a forest epidemic, motivated by sudden oak death in California. *Proceedings of the*  
776 *National Academy of Sciences of the United States of America*, 113:5640–5645.
- 777 Cunniffe, N. J. and Gilligan, C. A. (2010). Invasion, persistence and control in epidemic models for plant  
778 pathogens: the effect of host demography. *Journal of The Royal Society Interface*, 7:439–451.
- 779 Cunniffe, N. J., Koskella, B., E. Metcalf, C. J., Parnell, S., Gottwald, T. R., and Gilligan, C. A. (2015a). Thirteen  
780 challenges in modelling plant diseases. *Epidemics*, 10:6–10.
- 781 Cunniffe, N. J., Stutt, R. O., DeSimone, R. E., Gottwald, T. R., and Gilligan, C. A. (2015b). Optimising and commu-  
782 nicating options for the control of invasive plant disease when there is epidemiological uncertainty. *PLOS*  
783 *Computational Biology*, 11:e1004211.
- 784 Elderfield, J. A. D., Lopez-Ruiz, F. J., van den Bosch, F., and Cunniffe, N. J. (2018). Using epidemiological principles  
785 to explain fungicide resistance management tactics: why do mixtures outperform alternations? *Phytopathol-*  
786 *ogy*, 108:803–817.
- 787 Eriksen, L., Shaw, M. W., and Østergård, H. (2001). A model of the effect of pseudothecia on genetic recombina-  
788 tion and epidemic development in populations of *Mycosphaerella graminicola*. *Phytopathology*, 91:240–248.
- 789 Felsenstein, J. (1965). The effect of linkage on directional selection. *Genetics*, 52:349.
- 790 Fones, H. N., Bebber, D. P., Chaloner, T. M., Kay, W. T., Steinberg, G., and Gurr, S. J. (2020). Threats to global  
791 food security from emerging fungal and oomycete crop pathogens. *Nature Food* 2020 1:6, 1:332–342.
- 792 Garin, G., Pradal, C., Fournier, C., Claessen, D., Houlès, V., and Robert, C. (2018). Modelling interaction dynamics  
793 between two foliar pathogens in wheat: a multi-scale approach. *Annals of Botany*, 121:927–940.
- 794 Garnault, M., Duplaix, C., Leroux, P., Couleaud, G., Carpentier, F., David, O., and Walker, A.-S. (2019). Spatiotem-  
795 poral dynamics of fungicide resistance in the wheat pathogen *Zymoseptoria tritici* in France. *Pest Management*  
796 *Science*, 75:1794–1807.
- 797 Godfray, H. C. J., Crute, I. R., Haddad, L., Muir, J. F., Nisbett, N., Lawrence, D., Pretty, J., Robinson, S., Toulmin, C.,  
798 and Whiteley, R. (2010). The future of the global food system.
- 799 Hartmann, F. E., Vonlanthen, T., Singh, N. K., McDonald, M. C., Milgate, A., and Croll, D. (2020). The complex  
800 genomic basis of rapid convergent adaptation to pesticides across continents in a fungal plant pathogen.  
801 *Molecular Ecology*.



- 802 Hobbelen, P. H., Paveley, N. D., Oliver, R. P., and van den Bosch, F. (2013). The usefulness of fungicide mixtures  
803 and alternation for delaying the selection for resistance in populations of *Mycosphaerella graminicola* on  
804 winter wheat: a modeling analysis. *Phytopathology*, 103:690–707.
- 805 Hobbelen, P. H., Paveley, N. D., and van den Bosch, F. (2011a). Delaying selection for fungicide insensitivity  
806 by mixing fungicides at a low and high risk of resistance development: a modeling analysis. *Phytopathology*,  
807 101:1224–1233.
- 808 Hobbelen, P. H., Paveley, N. D., and van den Bosch, F. (2014). The emergence of resistance to fungicides. *PLoS*  
809 *ONE*, 9:91910.
- 810 Hobbelen, P. H. F., Paveley, N. D., Fraaije, B. A., Lucas, J. A., and van den Bosch, F. (2011b). Derivation and testing  
811 of a model to predict selection for fungicide resistance. *Plant Pathology*, 60:304–313.
- 812 Hyatt-Twynam, S. R., Parnell, S., Stutt, R. O. J. H., Gottwald, T. R., Gilligan, C. A., and Cunniffe, N. J. (2017). Risk-  
813 based management of invading plant disease. *New Phytologist*, 214:1317–1329.
- 814 Jorgensen, L. N., van den Bosch, F., Oliver, R. P., Heick, T. M., and Paveley, N. D. (2017). Targeting fungicide  
815 inputs according to need. *Annual Review of Phytopathology*, 55:181–203.
- 816 Laranjeira, F. F., Silva, S. X., Murray-Watson, R. E., Soares, A. C., Santos-Filho, H. P., and Cunniffe, N. J. (2020).  
817 Spatiotemporal dynamics and modelling support the case for area-wide management of citrus greasy spot  
818 in a Brazilian smallholder farming region. *Plant Pathology*, 69:467–483.
- 819 Lázaro, E., Makowski, D., and Vicent, A. (2021). Decision support systems halve fungicide use compared to  
820 calendar-based strategies without increasing disease risk. *Communications Earth & Environment* 2:1,  
821 2:1–10.
- 822 Leadbeater, A. J. (2014). Plant health management: fungicides and antibiotics. *Encyclopedia of Agriculture and*  
823 *Food Systems*, pages 408–424.
- 824 McDonald, B. A., Mundt, C. C., and Chen, R.-S. (1996). The role of selection on the genetic structure of pathogen  
825 populations: evidence from field experiments with *Mycosphaerella graminicola* on wheat. *Euphytica* 1996 92:1,  
826 92:73–80.
- 827 Mikaberidze, A. and McDonald, B. A. (2015). Fitness cost of resistance: impact on management. *Fungicide*  
828 *Resistance in Plant Pathogens*, pages 77–89.
- 829 Mikaberidze, A. and McDonald, B. A. (2020). A tradeoff between tolerance and resistance to a major fungal  
830 pathogen in elite wheat cultivars. *New Phytologist*, 226:879–890.
- 831 Mikaberidze, A., McDonald, B. A., and Bonhoeffer, S. (2014). Can high-risk fungicides be used in mixtures  
832 without selecting for fungicide resistance? *Phytopathology*, 104:324–331.

- 833 Mikaberidze, A., Paveley, N., Bonhoeffer, S., and Van Den Bosch, F. (2017). Emergence of resistance to fungi-  
834 cides: the role of fungicide dose. *Phytopathology*, 107:545.
- 835 Milgroom, M. G. (1990). A stochastic model for the initial occurrence and development of fungicide resistance  
836 in plant pathogen populations. *Phytopathology*, 80:410.
- 837 Mouratiadou, I., Latka, C., van der Hilst, F., Müller, C., Berges, R., Bodirsky, B. L., Ewert, F., Faye, B., Heckelei,  
838 T., Hoffmann, M., Lehtonen, H., Lorite, I. J., Nendel, C., Palosuo, T., Rodríguez, A., Rötter, R. P., Ruiz-Ramos,  
839 M., Stella, T., Webber, H., and Wicke, B. (2021). Quantifying sustainable intensification of agriculture: the  
840 contribution of metrics and modelling. *Ecological Indicators*, 129:107870.
- 841 Murray, J. (2019). What is the chlorothalonil ban imposed by the EU?
- 842 Onstad, D. W. and Rabbinge, R. (1985). Dynamic programming and the computation of economic injury levels  
843 for crop disease control. *Agricultural Systems*, 18:207–226.
- 844 Pacilly, F. C., Hofstede, G. J., Lammerts van Bueren, E. T., Kessel, G. J., and Groot, J. C. (2018). Simulating crop-  
845 disease interactions in agricultural landscapes to analyse the effectiveness of host resistance in disease con-  
846 trol: the case of potato late blight. *Ecological Modelling*, 378:1–12.
- 847 Parnell, S., Gilligan, C. A., Lucas, J. A., Bock, C. H., and Bosch, F. V. D. (2008). Changes in fungicide sensitivity  
848 and relative species abundance in *Oculimacula yallundae* and *O. acufiformis* populations (eyespot disease of  
849 cereals) in Western Europe. *Plant Pathology*, 57:509–517.
- 850 Parnell, S., Gilligan, C. A., and van den Bosch, F. (2005). Small-scale fungicide spray heterogeneity and the  
851 coexistence of resistant and sensitive pathogen strains. *Analytical and Theoretical Plant Pathology*, 95:632–  
852 639.
- 853 Parnell, S., van den Bosch, F., and Gilligan, C. A. (2006). Large-scale fungicide spray heterogeneity and the  
854 regional spread of resistant pathogen strains. *Analytical and Theoretical Plant Pathology*, 96:549–555.
- 855 Phelan, P. (2017). Timing is everything with fungicides - Farming Independent.
- 856 Rehfus, A., Strobel, D., Bryson, R., and Stammler, G. (2018). Mutations in *sdh* genes in field isolates of *Zy-*  
857 *moseptoria tritici* and impact on the sensitivity to various succinate dehydrogenase inhibitors. *Plant Pathology*,  
858 67:175–180.
- 859 Ristaino, J. B., Anderson, P. K., Bebber, D. P., Brauman, K. A., Cunniffe, N. J., Fedoroff, N. V., Finegold, C., Garrett,  
860 K. A., Gilligan, C. A., Jones, C. M., Martin, M. D., MacDonald, G. K., Neenan, P., Records, A., Schmale, D. G.,  
861 Tateosian, L., and Wei, Q. (2021). The persistent threat of emerging plant disease pandemics to global food  
862 security. *Proceedings of the National Academy of Sciences*, 118.
- 863 Rupp, S., Weber, R. W. S., Rieger, D., Detzel, P., and Hahn, M. (2017). Spread of *Botrytis cinerea* strains with  
864 multiple fungicide resistance in German horticulture. *Frontiers in Microbiology*, 0:2075.

- 865 Samoucha, Y. (1987). Use of two- and three-way mixtures to prevent buildup of resistance to phenylamide  
866 fungicides in *Phytophthora* and *Plasmopara*. *Phytopathology*, 77:1405.
- 867 Shaw, M. W. (1989). A model of the evolution of polygenically controlled fungicide resistance. *Plant Pathology*,  
868 38:44–55.
- 869 Shaw, M. W. (2000). Models of the effects of dose heterogeneity and escape on selection pressure for pesticide  
870 resistance. *Phytopathology*, 90:333–339.
- 871 Shaw, M. W. and Royle, D. J. (1989). Airborne inoculum as a major source of *Septoria tritici* (*Mycosphaerella*  
872 *graminicola*) infections in winter wheat crops in the UK. *Plant Pathology*, 38:35–43.
- 873 Singh, N. K., Karisto, P., and Croll, D. (2021). Population-level deep sequencing reveals the interplay of clonal  
874 and sexual reproduction in the fungal wheat pathogen *Zymoseptoria tritici*. *Microbial Genomics*, 7:000678.
- 875 Staub, T. (1991). Fungicide resistance: practical experience with antiresistance strategies and the role of inte-  
876 grated use. *Annual Review of Phytopathology*, pages 421–442.
- 877 Strange, R. N. and Scott, P. R. (2005). Plant disease: A threat to global food security. *Annual Review of Phy-*  
878 *topathology*, 43:83–116.
- 879 Suffert, F., Delestre, G., Carpentier, F., Gazeau, G., Walker, A. S., Gélisse, S., and Duplaix, C. (2016). Fashionably  
880 late partners have more fruitful encounters: impact of the timing of co-infection and pathogenicity on sexual  
881 reproduction in *Zymoseptoria tritici*. *Fungal Genetics and Biology*, 92:40–49.
- 882 Suffert, F., Delestre, G., and Gélisse, S. (2018). Sexual reproduction in the fungal foliar pathogen *Zymoseptoria*  
883 *tritici* is driven by antagonistic density dependence mechanisms. *Microbial Ecology* 2018 77:1, 77:110–123.
- 884 Suffert, F., Sache, I., and Lannou, C. (2011). Early stages of septoria tritici blotch epidemics of winter wheat:  
885 build-up, overseasoning, and release of primary inoculum. *Plant Pathology*, 60:166–177.
- 886 Tai, A. P., Martin, M. V., and Heald, C. L. (2014). Threat to future global food security from climate change and  
887 ozone air pollution. *Nature Climate Change*, 4:817–821.
- 888 te Beest, D., Paveley, N., Shaw, M., and van den Bosch, F. (2008). Disease-weather relationships for powdery  
889 mildew and yellow rust on winter wheat. *Phytopathology*, 98:609–617.
- 890 te Beest, D. E., Paveley, N. D., Shaw, M. W., and van den Bosch, F. (2013). Accounting for the economic risk caused  
891 by variation in disease severity in fungicide dose decisions, exemplified for *Mycosphaerella graminicola* on  
892 winter wheat. *Analytical and Theoretical Plant Pathology*, 103:666–672.
- 893 Torriani, S. F., Melichar, J. P., Mills, C., Pain, N., Sierotzki, H., and Courbot, M. (2015). *Zymoseptoria tritici*: A major  
894 threat to wheat production, integrated approaches to control. *Fungal Genetics and Biology*, 79:8–12.

- 895 van den Berg, F., Paveley, N. D., and van den Bosch, F. (2016). Dose and number of applications that maxi-  
896 mize fungicide effective life exemplified by *Zymoseptoria tritici* on wheat – a model analysis. *Plant Pathology*,  
897 65:1380–1389.
- 898 van den Berg, F., van den Bosch, F., and Paveley, N. D. (2013). Optimal fungicide application timings for disease  
899 control are also an effective anti-resistance strategy: A case study for *Zymoseptoria tritici* (*Mycosphaerella*  
900 *graminicola*) on wheat. *Phytopathology*, 103:1209–1219.
- 901 van den Bosch, F., Blake, J., Gosling, P., Helps, J. C., and Paveley, N. (2020). Identifying when it is financially  
902 beneficial to increase or decrease fungicide dose as resistance develops: An evaluation from long-term field  
903 experiments. *Plant Pathology*, 69:631–641.
- 904 van den Bosch, F. and Gilligan, C. A. (2008). Models of fungicide resistance dynamics. *Annual Review of Phy-*  
905 *topathology*, 46:123–147.
- 906 van den Bosch, F., Oliver, R., van den Berg, F., and Paveley, N. (2014a). Governing principles can guide fungicide-  
907 resistance management tactics. *Annual Review of Phytopathology*, 52:175–195.
- 908 van den Bosch, F., Paveley, N., Shaw, M., Hobbelen, P., and Oliver, R. (2011). The dose rate debate: Does the  
909 risk of fungicide resistance increase or decrease with dose? *Plant Pathology*, 60:597–606.
- 910 van den Bosch, F., Paveley, N., van den Berg, F., Hobbelen, P., and Oliver, R. (2014b). Mixtures as a fungicide  
911 resistance management tactic. *Phytopathology*, 104:1264–1273.
- 912 Zadoks, J. C., Chang, T. T., and Konzak, C. F. (1974). A decimal code for the growth stages of cereals. *Weed*  
913 *Research*, 14:415–421.
- 914 Zhan, J., Mundt, C. C., and McDonald, B. A. (1998). Measuring immigration and sexual reproduction in field  
915 populations of *Mycosphaerella graminicola*. *Phytopathology*, 88:1330–1337.

916 **Supplementary Text 1**

917 **Between-season sexual reproduction – derivation**

918 For between-season sexual reproduction, we assume that the recombination is random, so  
 919 that each (haploid) offspring has an equal probability of inheriting each allele from either  
 920 (haploid) parent (Supplementary Text 1 Table 1). We have two unlinked (assumed) loci, each  
 921 with two alleles: resistant or sensitive.

| Pathogen strains | <i>ss</i>          | <i>sr</i>          | <i>rs</i>          | <i>rr</i>          |
|------------------|--------------------|--------------------|--------------------|--------------------|
| <i>ss</i>        | <i>ss</i>          | <i>ss/sr</i>       | <i>ss/rs</i>       | <i>ss/sr/rs/rr</i> |
| <i>sr</i>        | <i>ss/sr</i>       | <i>sr</i>          | <i>ss/sr/rs/rr</i> | <i>rr/sr</i>       |
| <i>rs</i>        | <i>ss/rs</i>       | <i>ss/sr/rs/rr</i> | <i>rs</i>          | <i>rr/rs</i>       |
| <i>rr</i>        | <i>ss/sr/rs/rr</i> | <i>rr/sr</i>       | <i>rr/rs</i>       | <i>rr</i>          |

923 **Supplementary Text 1 Table 1.** The possible offspring of sexual reproduction between parents  
 924 given by the left column and top row are shown. For those entries which contain four strains, the  
 925 probability of each is 1/4, so each number is accordingly scaled. Similarly those entries containing two  
 926 strains each have probability 1/2. Note that both parents and offspring are haploid; for example *sr*  
 927 corresponds to a haploid which carries the allele for sensitivity (*s*) to fungicide *A* on one chromosome,  
 928 and the allele for resistance (*r*) to fungicide *B* on another.

Let  $F_{mn}$  denote the frequency (a proportion  $\in [0, 1]$  of total disease) of strain *mn* immedi-  
 930 ately before the single, instantaneous round of between-season sexual reproduction which  
 931 we model. Let  $Y_{mn}$  represent the frequency of strain *mn* immediately afterwards. Then col-  
 932 lecting together all the terms, we find:

$$\begin{aligned}
 Y_{ss} &= F_{ss}^2 + \frac{1}{2}(F_{ss}F_{sr} + F_{sr}F_{ss}) + \frac{1}{2}(F_{ss}F_{rs} + F_{rs}F_{ss}) + \frac{1}{4}(F_{ss}F_{rr} + F_{rr}F_{ss}) + \frac{1}{4}(F_{sr}F_{rs} + F_{rs}F_{sr}) \\
 &= F_{ss}^2 + F_{ss}F_{sr} + F_{ss}F_{rs} + \frac{1}{2}F_{ss}F_{rr} + \frac{1}{2}F_{sr}F_{rs},
 \end{aligned}
 \tag{31}$$

936 and similarly:

$$Y_{sr} = F_{sr}^2 + F_{sr}F_{ss} + F_{sr}F_{rr} + \frac{1}{2}F_{ss}F_{rr} + \frac{1}{2}F_{sr}F_{rs},
 \tag{32}$$

$$Y_{rs} = F_{rs}^2 + F_{rs}F_{ss} + F_{rs}F_{rr} + \frac{1}{2}F_{ss}F_{rr} + \frac{1}{2}F_{sr}F_{rs},
 \tag{33}$$

$$Y_{rr} = F_{rr}^2 + F_{rr}F_{sr} + F_{rr}F_{rs} + \frac{1}{2}F_{ss}F_{rr} + \frac{1}{2}F_{sr}F_{rs}.
 \tag{34}$$

940 This can be simplified by noting that,  $F_{ss} + F_{sr} + F_{rs} + F_{rr} = 1$ , and that, using the *ss* strain

944

945 as an for example:

$$\begin{aligned} Y_{ss} &= F_{ss}(F_{ss} + F_{sr} + F_{rs} + F_{rr}) - \frac{1}{2}F_{ss}F_{rr} + \frac{1}{2}F_{sr}F_{rs} \\ &= F_{ss} - \frac{1}{2}F_{ss}F_{rr} + \frac{1}{2}F_{sr}F_{rs}. \end{aligned} \quad (35)$$

949 Now define:

$$D = F_{ss}F_{rr} - F_{sr}F_{rs}. \quad (36)$$

951 Then we find:

$$Y_{ss} = F_{ss} - \frac{1}{2}D; \quad Y_{sr} = F_{sr} + \frac{1}{2}D; \quad Y_{rs} = F_{rs} + \frac{1}{2}D; \quad Y_{rr} = F_{rr} - \frac{1}{2}D. \quad (37)$$

954 This form is equivalent to that of **Felsenstein (1965)** for a haploid population, with two  
955 alleles at two loci and discrete generations (we use  $F_{mn}$  in place of their  $x_i$ ). We assume that  
956 the recombination fraction  $r = 1/2$ , corresponding to the two loci being unlinked. We also  
957 assume that the probability of surviving from meiosis to fertilisation is equal for all strains,  
958 in line with our assumption that the strains behave identically in the absence of fungicide.

959 **Supplementary Text 2**

960 **Between-season sexual reproduction – effect on the model**

961 Depending on initial resistance frequencies and fungicide parameterisations, we can ob-  
 962 serve:

- 963 • non-monotonic response in maximum effective life as  $q_B$  increases (Supplementary  
 964 Text 2 Figure 1A);
- 965 • no effect on maximum effective life as  $q_B$  increases (Supplementary Text 2 Figure 1B);
- 966 • monotone increase in maximum effective life as  $q_B$  increases (Supplementary Text 2  
 967 Figure 1C).

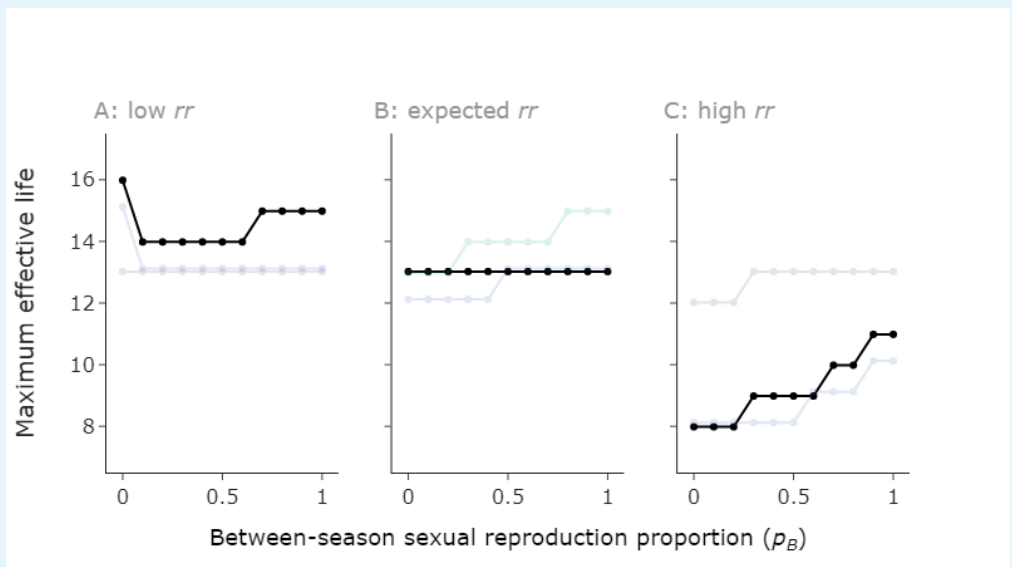

968 **Supplementary Text 2 Figure 1. Three effects are possible with sexual reproduction.** This figure  
 969 is exactly as in Figure 5 (main text), but highlighting the three qualitative behaviours we see as the  
 970 proportion of sexual reproduction ( $q_B$ ) increases. These are: **(A)** non-monotonicity; **(B)** no change in  
 971 effective life; and **(C)** monotone increase in effective life as  $q_B$  increases. **Parameter values:** as in  
 972 Figure 5 (main text); random fungicide parameter values and single resistant frequencies, generated  
 973 from distributions described in Table 3. **A:** initial double resistant strain ( $rr$ ) density  $10^{-4}$  times lower  
 974 than value from linkage equilibrium (VLE); **B:** initial  $rr$  density at VLE; **C:** initial  $rr$  density  $10^4$  times  
 975 higher than VLE. Values:  $(p_{rr}, p_{rs}, p_{sr}, \Lambda_A, \Lambda_B, \omega_A, \omega_B, \theta_A, \theta_B) =$  **Scenario 1:**  
 976  $(7.049916 \times [10^{-19} / 10^{-15} / 10^{-11}], 5.545997 \times 10^{-7}, 1.269711 \times$   
 977  $10^{-8}, 0.009758, 0.022030, 0.729797, 0.661193, 7.362942, 6.642679)$ ; **Scenario 2:**  
 978  $(1.085892 \times [10^{-15} / 10^{-11} / 10^{-7}], 1.596583 \times 10^{-6}, 6.801290 \times$   
 979  $10^{-6}, 0.007417, 0.009834, 0.574543, 0.706497, 11.143576, 11.170345)$ ; **Scenario 3:**  
 980  $(2.445955 \times [10^{-15} / 10^{-11} / 10^{-7}], 7.155682 \times 10^{-5}, 3.417953 \times$   
 981  $10^{-7}, 0.005803, 0.006279, 0.875035, 0.717337, 8.544356, 11.404773)$ .  
 982

For medium or high initial levels of the double resistant, we typically only see the latter two behaviours (no change or monotone increase). This is because sexual reproduction acts to suppress the double resistant strain, as shown by the between-season equation for

986

987

988

989

990

991

992

993

994

995

996

997

998

999

1000

1001

1002

1003

1004

1005

1006

1007

1008

1009

1010

1011

1012

1013

1014

1015

1016

1017

the  $rr$  strain:

$$P_{rr} = F_{rr} - \frac{1}{2}q_B D. \quad (38)$$

Therefore if  $D = F_{rr}F_{ss} - F_{sr}F_{rs} > 0$ , we expect a decrease in the level of double resistant after the sexual reproduction step (for any  $q_B > 0$ , i.e. any non-zero amount of sexual reproduction). Note that  $D > 0$  is equivalent to  $F_{rr} > F_{sr}F_{rs}/F_{ss}$ . Initially  $F_{ss} \approx 1$ , so the threshold  $F_{sr}F_{rs}/F_{ss} \approx F_{sr}F_{rs}$ . The effect of sexual reproduction decreasing the rate of the double resistant strain increasing is particularly clear in Supplementary Text 2 Figure 2H, and is present but to a lesser extent in Supplementary Text 2 Figure 2D.

When the effective life is the same across different levels of sexual reproduction, this is caused by increases in the single-resistant strains relative to the asexual case (Supplementary Text 2 Figure 2E,F,I,J). This offsets the decrease in the double-resistant strain. Whether the single or double resistant strain plays the major role in yield losses depends on the efficacy of the fungicides – very high efficacy fungicides are capable of controlling the single resistant strains since one component of the mixture remains effective. For example, relatively good control of the single resistant strains in Supplementary Text 2 Figure 2A,B,C means that the effective life is quite long, since it takes a long time for the double resistant to reach sufficiently high frequencies to reduce yields below 95%. In contrast, poor control from fungicide A and good control from fungicide B in Supplementary Text 2 Figure 2D,E,F means that the strains resistant to fungicide B (strains  $sr$ ,  $rr$ ) rapidly increase in density and lead to loss of control whilst strain  $rs$  declines.

If the level of double resistant is very low ( $F_{rr} < F_{sr}F_{rs}/F_{ss}$ ), then  $D < 0$  and the double resistant increases in density (Supplementary Text 2 Figure 2A). This increase is only seen in the first year, after which point the double resistant remains at a level at least as high as  $F_{sr}F_{rs}/F_{ss}$  due to the greater selection for the  $rr$  strain in comparison to the other strains every year. The non-monotonic effect is due to even low levels of sexual reproduction leading to an increase in the double resistant after the first off-season, but higher levels of sexual reproduction again suppressing the double resistant strain in subsequent years. This is shown by the decreased gradient of sexual proportion  $q_B = 1$  vs sexual proportion  $q_B = 0.5$  in Supplementary Text 2 Figure 2A.



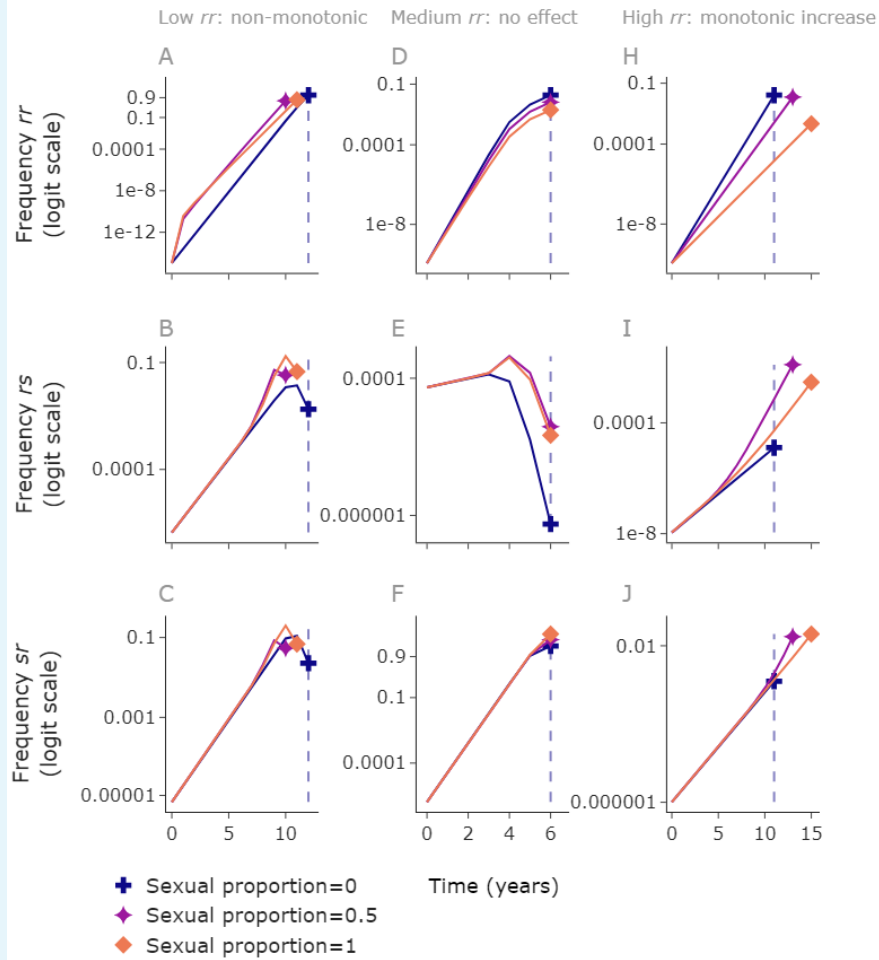

1018

**Supplementary Text 2 Figure 2. Higher between-season sexual reproduction slows the double resistant strain.**

1019  
1020  
1021  
1022  
1023  
1024  
1025  
1026  
1027  
1028  
1029  
1030  
1031  
1032  
1033  
1034  
1035  
1036  
1037

Three different scenarios, demonstrating the three qualitative behaviours from Supplementary Text 2 Figure 1: non-monotonicity in effective life as  $q_B$  increases; no change in effective life as  $q_B$  increases; monotonic increase as  $q_B$  increases. The dotted line is the effective life of the asexual reproduction case. Note that here we compare full dose of both fungicides in each case, whereas in Supplementary Text 2 Figure 1 and main text, Figure 5, we compare the optimal dose from the 21 by 21 grid of doses in each case. The randomly generated scenarios that we show here are different to any shown in Supplementary Text 2 Figure 1, but here we are comparing something different (full dose rather than optimal dose). **NB** the subplots in each column are for the same scenario, but the scenarios are completely different between columns (not just a change in initial resistance frequencies).

**Left column:** the ‘non-monotonicity’ case. In this example the double resistant strain is lower than the value at linkage equilibrium (VLE) by  $10^{-4}$ . Here high values of  $q_B$ , or  $q_B = 0$  give longer effective lives than intermediate values. **Middle column:** the ‘no effect’ case. In this example the double resistant strain is at VLE. Here there is a faster increase in the double resistant strain when  $q_B = 0$  (D) but this is offset by reduced growth of the single resistant strains (E,F). **Right column:** the ‘monotonic increase’ case. In this example the double resistant strain is higher than the VLE by  $10^4$ . Here the faster growth of the double resistant strain when  $q_B = 0$  causes a shorter effective life than we see in the case where  $q_B$  takes larger values.

1038  
1039  
1040  
1041  
1042  
1043  
1044

**Parameter values.** Generated at random: ( $I_{rr}, I_{sr}, I_{rs}, \omega_A, \omega_B, \theta_A, \theta_B, \Lambda_A, \Lambda_B$ ) = **left column:** ( $1.085892 \times 10^{-15}, 6.8012899586885546 \times 10^{-6}, 1.596583402894029 \times 10^{-6}, 0.574543, 0.706497, 11.143576, 11.170345, 0.007417, 0.009834$ ); **middle column:** ( $1.140463 \times 10^{-10}, 1.545001824789278 \times 10^{-6}, 7.38107054353044 \times 10^{-5}, 0.983611, 0.82889, 9.581831, 5.728716, 0.032598, 0.003884$ ); **right column:** ( $1.121325 \times 10^{-10}, 1.0174155443038875 \times 10^{-6}, 1.1002632709098869 \times 10^{-8}, 0.697464, 0.480298, 5.136889, 5.748469, 0.016088, 0.011044$ ).

### 1045 Supplementary Text 3

#### 1046 **Between-season sexual reproduction – mixtures vs alternations**

1047 We now explore the effect of varying the between-season sexual reproduction  $q_B$  on the  
1048 model output and the optimal strategy. To check that mixtures outperform alternations  
1049 when between-season sexual reproduction was present, we ran a simple scan where between-  
1050 season reproduction was entirely sexual. The case where reproduction was entirely asex-  
1051 ual has previously been examined in *Hobbelen et al. (2013)*; *Elderfield et al. (2018)*, and  
1052 mixtures were found to outperform alternations.

1053 We tested 100 randomly generated scenarios (Supplementary Text 3 Table 1). We var-  
1054 ied the asymptote, curvature and decay rate parameters of both fungicides, as well as the  
1055 initial resistance frequencies, ignoring any parameter sets where either of the alternation  
1056 strategies had an effective life of 0 (i.e. could never achieve a yield  $\geq 95\%$ ). Using a grid of  
1057  $51 \times 51$  doses, we checked whether the maximum effective life from the mixture tactic in  
1058 each case was greater than or equal to the maximum effective life from either alternation  
1059 tactic (applying fungicide *A* first each year or applying fungicide *B* first each year). In every  
1060 case, the mixture tactic was at least as good as either alternation tactic (Supplementary Text  
1061 3 Figure 1).

| Variable                              | Range/value                  | Distribution |
|---------------------------------------|------------------------------|--------------|
| Initial proportion, strain $r_S, s_r$ | $[10^{-10}, 10^{-4}]$        | Log-uniform  |
| Initial proportion, strain $r_r$      | $[10^{-15}, 10^{-6}]$        | Log-uniform  |
| Fungicide asymptote                   | $[0.4, 1]$                   | Uniform      |
| Fungicide curvature                   | $[4, 12]$                    | Uniform      |
| Fungicide decay rate $A$              | $[1/3\Lambda_0, 3\Lambda_0]$ | Uniform      |

1063 **Supplementary Text 3 Table 1.** Bounds for the parameter scan used to confirm that mixtures  
1064 outperform alternations. For this scan we used a grid of  $51 \times 51$  doses, and checked that the  
1065 maximum effective life from the mixture grid was greater than or equal to the maximum from the  
1066 alternation grid for each example. We tested the case where between-season reproduction was  
1067 entirely sexual. Unless stated above, all other parameters take their default values (see Table 1). Note  
1068 the fungicide decay rate range depends on  $\Lambda_0$ , which is  $1.11 \times 10^{-2}$  degree days $^{-1}$  as in Table 1.

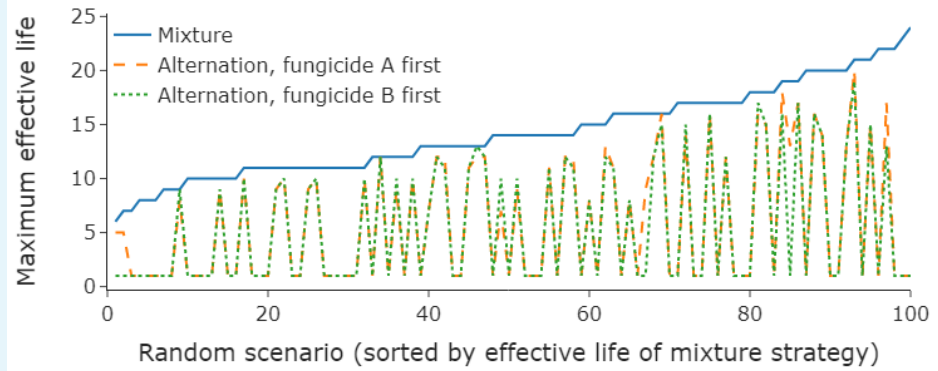

1070  
1071  
1072  
1073  
1074  
1076

**Supplementary Text 3 Figure 1. Mixtures outperform alternation even with between-season sexual reproduction.** Here are the optimal effective lives from 100 randomly generated scenarios. The scenarios are arranged from smallest to largest effective life of the mixture strategy. Here we consider the optimal dose from a 51 by 51 grid. **Parameter values:** randomly generated, see Supplementary Text 3 Table 1.

## 1077 Supplementary Text 4

### 1078 Parameter scan – link between curvature and dose

1079 The following argument will show the link between curvature and dose which allows us to  
1080 generalise the parameter scan results (Tables 5, 6 and Figure 6) to a wider range of fungi-  
1081 cides. In particular, we show that any pair of fungicides with identical decay rate and asymp-  
1082 tote but differing curvature can be considered to behave identically with an appropriate  
1083 change of dose. To meet legal dose requirements (doses less than 1), we note that this  
1084 applies to any higher efficacy fungicides (increased curvature) than those tested, and some  
1085 lower efficacy ones (see below).

1086 For a dose  $C$  of a fungicide  $F$ , we use dose responses of the type

$$1087 \delta_{F,s}(C) = 1 - \omega(1 - e^{-\theta C}), \quad (39)$$

1088 where  $\delta_{F,s}(C) \leq 1$  is the factor by which the rates of the transition of tissue from healthy to  
1089 latent ( $\beta$ ), and from latent to infected ( $\gamma$ ) are reduced. Now define  $\epsilon$  as the effect on sensitive  
1090 strains:

$$1091 \epsilon(C) = 1 - \delta_{F,s}(C) = \omega(1 - e^{-\theta C}). \quad (40)$$

1092 We also assume fungicide concentrations decay exponentially, so that  $t$  units after a dose  
1093 application the concentration will be:

$$1094 C(t) = (C_0 + D)\exp(-\Delta t), \quad (41)$$

1095 where  $\Delta$  is the decay rate,  $C_0$  was the concentration immediately before the application, and  
1096  $D$  was the applied dose.

1097 Consider a pair of fungicides 1 and 2 which differ only in their curvature, i.e. have param-  
1098 eters  $(\omega, \theta_1, \Delta)$  and  $(\omega, \theta_2, \Delta)$ . Then if we apply a dose of fungicide 2 such that

$$1099 C_2 = \frac{C_1 \theta_1}{\theta_2} = K C_1, \quad (42)$$

1104

1105 then we find:

$$\epsilon_1(C_1) = \omega \left( 1 - \exp \left( -\theta_1 (C_0 + D) \exp(-\Delta t) \right) \right), \quad (43)$$

$$\begin{aligned} \epsilon_2(C_2) &= \omega \left( 1 - \exp \left( -\theta_2 \frac{(C_0 + D)\theta_1}{\theta_2} \exp(-\Delta t) \right) \right) \\ &= \omega \left( 1 - \exp \left( -\theta_1 (C_0 + D) \exp(-\Delta t) \right) \right) = \epsilon_1(C_1). \end{aligned} \quad (44)$$

1106 That is, if fungicide 1 has a curvature that is a factor of  $K$  bigger than fungicide 2, we can  
 1107 apply doses that are a factor of  $K$  smaller than fungicide 2. Then we end up with an identical  
 1108 form for  $\epsilon_1$  and  $\epsilon_2$ , and so an identical form for  $\delta_{1,s}(C_1)$  and  $\delta_{2,s}(C_2)$ , even when accounting for  
 1109 the decay in concentration over time. This means that the two fungicides behave identically  
 1110 if these doses are applied (Supplementary Text 4 Figure 1).

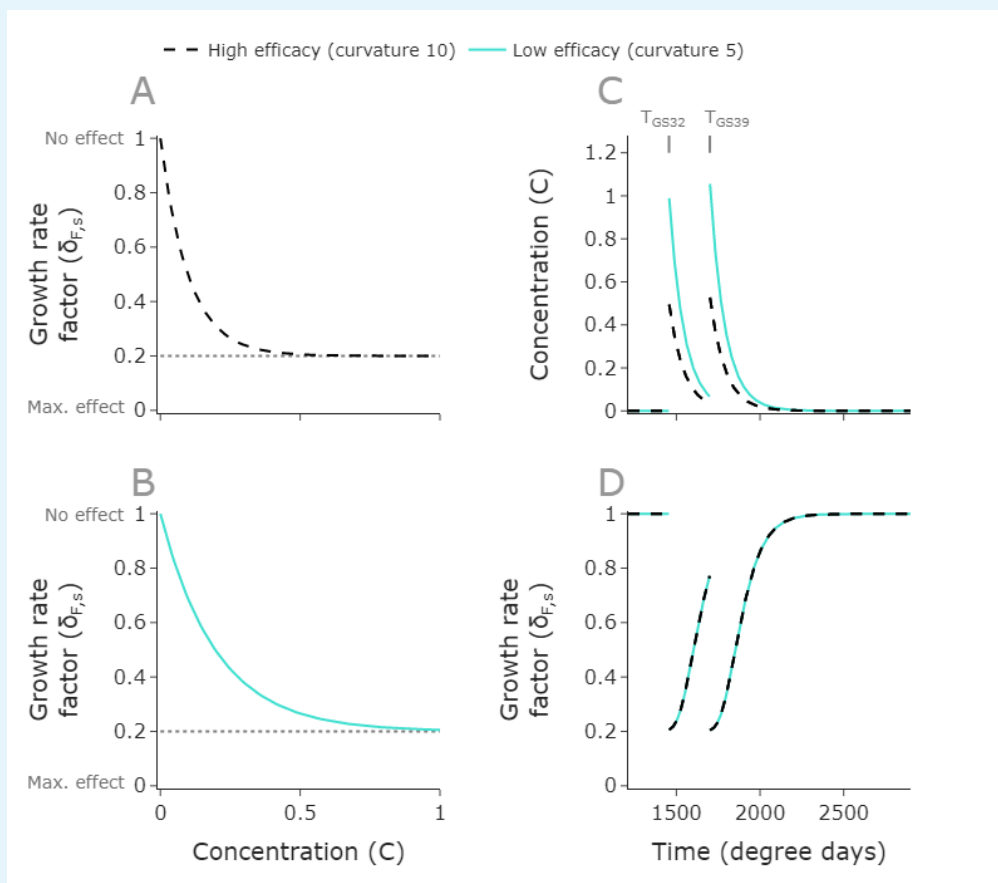

1117

1118 **Supplementary Text 4 Figure 1. Fungicides with different curvatures can behave identically**  
 1119 **with appropriate dose choice.** One fungicide has a curvature  $\theta_h = 10$  and the other has a curvature  
 1120 of  $\theta_l = 5$ . Both have the same asymptote and decay rate, which is required for this effect. This  
 1121 parameterisation results in the former fungicide having a higher efficacy (**A, B**). Applying  
 1122 appropriately scaled doses:  $D_h = D_l \theta_l / \theta_h$ , so that  $D_l = 1$ ,  $D_h = 0.5$ , (**C**), the effect is identical (**D**). Since  
 1123 the lower efficacy fungicide has half the curvature, it requires double the dose.

1124 **Parameter values:** higher efficacy fungicide  $\theta_h = 10$ . Lower efficacy fungicide:  $\theta_l = 5$ . Both have  
 1125 asymptote  $\omega = 0.8$  and decay rate  $\Lambda = 1.11 \times 10^{-2}$ . Doses applied in **B**: ( $D_h, D_l = 0.5, 1$ ).

1126

1129

1130

1127

1131

### Legal dose caveat

1132

Note that to ensure that we remain within legal requirements for doses ( $C < 1$ ), we require that

1133

$$C_2 = \frac{C_1 \theta_1}{\theta_2} \leq 1, \quad (45)$$

1134

1135

so the parameter scan analysis can only directly be transferred to fungicides with curvatures satisfying

1136

1137

$$\theta_2 \geq \theta_1 C_{1,optimal}. \quad (46)$$

1138

1139

1140

Since minimal doses tend to be optimal, this means our results may be generalised for a range of fungicides that are lower or equal efficacy than those in the scan ( $\theta_1 C_{1,optimal} \leq \theta_2 \leq \theta_1$ ), and any fungicides that are higher efficacy (higher curvature than  $\theta_1$ ).

1141

1142

1143

For instance, if a particular fungicide with curvature 8 had an optimal dose of 0.25 in a mixture, then we could apply our results to any fungicide with curvature  $\theta \geq 8 \times 0.25 = 2$ , using optimal dose  $2/\theta \leq 1$ .

## 1144 **Supplementary Text 5**

### 1145 **Parameter scan – sub-optimal runs**

#### 1146 **Runs in which equal resistance frequencies at breakdown was sub-optimal**

1147 There were initially 8 runs of the 500 for which equal resistance frequencies at breakdown  
1148 (ERFB) appeared to not give optimal results. However, when re-running so that a much  
1149 larger number of doses along the contour were chosen (500 and in a narrower range around  
1150 the optimum), 3 of these cases were found to be optimal, leaving only 5 runs that were  
1151 sub-optimal after the more computationally intensive search. The remaining 5 runs (Sup-  
1152 plementary Text 5 Figure 1) the results remained sub-optimal by one year even when the  
1153 denser grid was used. Parameter values for these runs are in Supplementary Text 5 Table  
1154 1.

1155 In each of these cases, the optimal region is very small. There is a much larger region  
1156 which achieves an effective life within one year of the optimal value. In this larger region,  
1157 the resistance management offered is relatively good. The doses in the optimal region offer  
1158 better control in that year than the surrounding region. The location of this region depends  
1159 on the efficacy of the two fungicides, and in these 5 cases the ERFB contour does not pass  
1160 through the optimal region. We examine one of these runs (scenario B) in Supplementary  
1161 Text 5 Figure 2.

1162 Some dose-pairs near the optimal region are sub-optimal effective lives because they of-  
1163 fer slightly poorer control, despite good resistance management. Other higher dose choices  
1164 near the optimal region are sub-optimal because the poorer quality resistance management  
1165 is bad enough to not offset the greater control caused by higher doses in the final year.

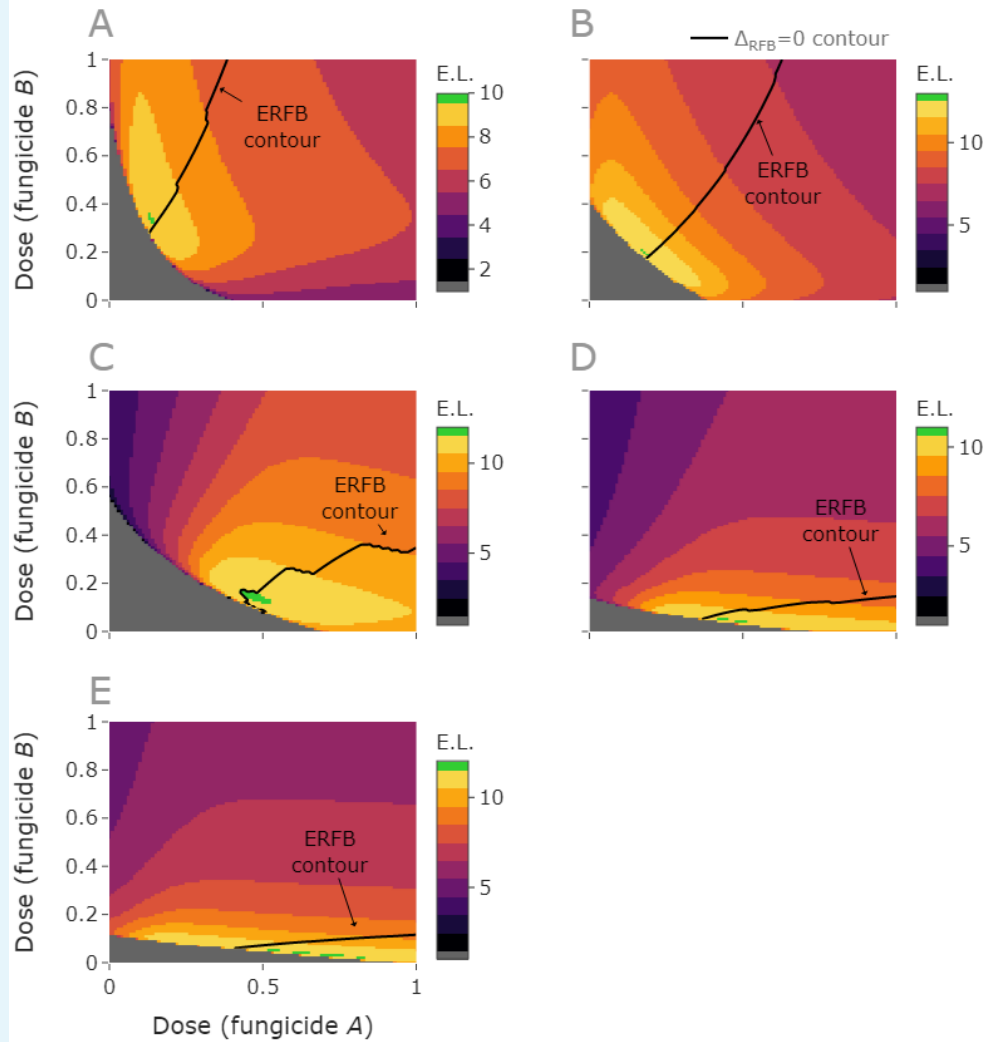

1166  
1167  
1168  
1169  
1170  
1172

**Supplementary Text 5 Figure 1. All sub-optimal runs.** All 5 sub-optimal runs are shown, here on a 101 by 101 grid. In each case the optimal region is very small and gives a one year improvement relative to the best dose along the ERFB contour. In each case the contour narrowly misses the optimal region.

**Parameter values:** see Supplementary Text 5 Table 1.



|                  | A                                                                                                                      | B                          | C                         | D                         | E                          |
|------------------|------------------------------------------------------------------------------------------------------------------------|----------------------------|---------------------------|---------------------------|----------------------------|
| $\omega_A$       | 0.492317                                                                                                               | 0.812490                   | 0.815263                  | 0.814526                  | 0.924196                   |
| $\omega_B$       | 0.637730                                                                                                               | 0.692780                   | 0.675103                  | 0.806968                  | 0.930859                   |
| $\theta_A$       | 6.816520                                                                                                               | 2.951951                   | 10.259259                 | 7.407919                  | 4.753716                   |
| 1173 $\theta_B$  | 9.333866                                                                                                               | 7.009989                   | 3.628018                  | 9.627502                  | 10.083944                  |
| 1174 $\Lambda_A$ | 0.003854                                                                                                               | 0.004001                   | 0.013152                  | 0.011560                  | 0.012227                   |
| $\Lambda_B$      | 0.009849                                                                                                               | 0.006771                   | 0.005065                  | 0.004593                  | 0.004933                   |
| $p_{rr}$         | $7.540441 \times 10^{-8}$                                                                                              | $1.165713 \times 10^{-9}$  | $1.679725 \times 10^{-9}$ | $3.379948 \times 10^{-9}$ | $2.632505 \times 10^{-10}$ |
| $p_{rs}$         | $2.332734 \times 10^{-5}$                                                                                              | $5.311738 \times 10^{-10}$ | $2.214624 \times 10^{-9}$ | $8.008551 \times 10^{-9}$ | $1.153372 \times 10^{-9}$  |
| $p_{sr}$         | $2.697823 \times 10^{-6}$                                                                                              | $1.312246 \times 10^{-10}$ | $5.736566 \times 10^{-4}$ | $2.206591 \times 10^{-5}$ | $5.557970 \times 10^{-8}$  |
| $q_B$            | 0.6347437                                                                                                              | 0.6778327                  | 0.488108                  | 0.282625                  | 0.108196                   |
| 1175<br>1176     | <b>Supplementary Text 5 Table 1.</b> Parameter values for the sub-optimal runs shown in Supplementary Text 5 Figure 1. |                            |                           |                           |                            |

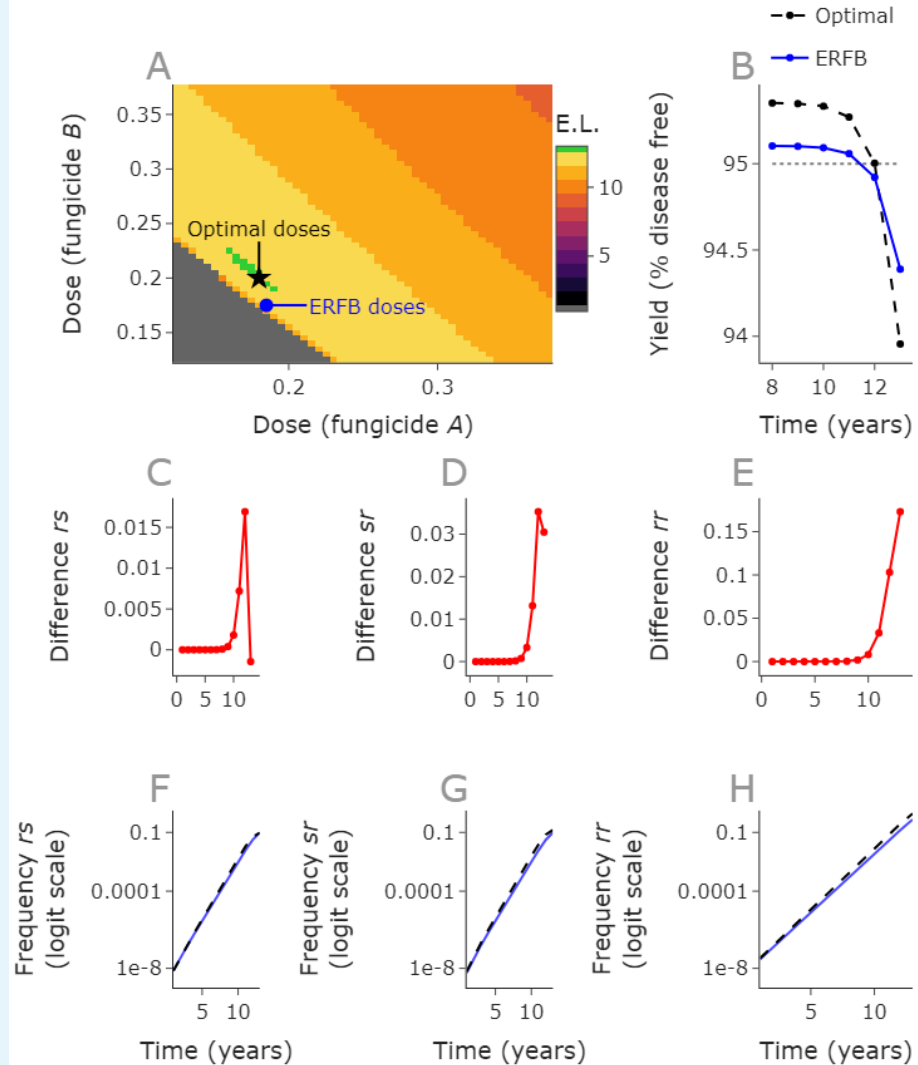

1178  
1179  
1180  
1181  
1182  
1183  
1184  
1185  
1186  
1188

**Supplementary Text 5 Figure 2. Final year control causes the small number of exceptions where the ERFB strategy is sub-optimal.** The optimal strategy achieves a yield of 95.003% in year 12, compared to the ERFB strategy which achieves 94.92% in this year (B). The optimal strategy fails in year 13, whereas the ERFB strategy fails in year 12 (A). Despite lower incidences of all resistant strains under the ERFB strategy, (F, G, H), the control offered by the doses is lower in year 12, since the dose of fungicide B is much lower. Each resistant strain increases faster under the optimal strategy, meaning that the differences in frequency increase over time (C, D, E). **Parameter values:** see Supplementary Text 5 Table 1, scenario B. Doses: optimal = 0.18, 0.2, ERFB = 0.185, 0.175.

Taking the first of the sub-optimal examples (Supplementary Text 5 Figure 1A), we see that for a small perturbation in initial resistance frequencies this effect disappears and ERFB is optimal (Supplementary Text 5 Figure 3). This supports the conclusion that the effect is caused by control in the final year, which is why every sub-optimal run of the 500 was only worse than the optimal by a single year. By the failure year, usually resistance frequencies are increasing rapidly and yield is falling steeply (main text, Figure 2F, 2G). This is why it

1194

1195

1196

1197

is rare to have such a small optimal region; more commonly all doses within a larger optimal region are further above 95% in the penultimate year and further below 95% in the breakdown year.

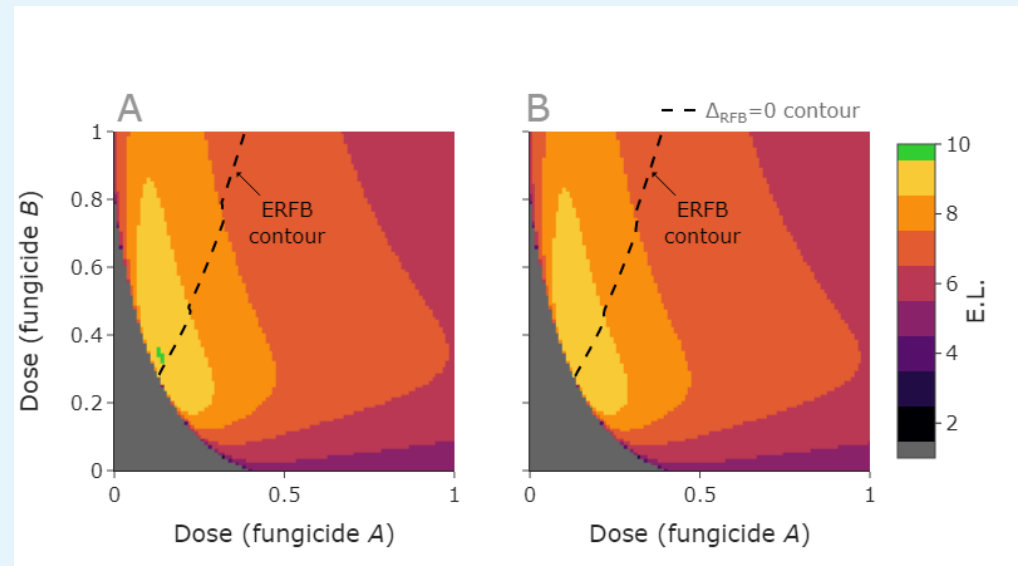

1198

1199

1200

1201

1202

1203

1204

1205

1206

1207

1208

1209

1210

1211

1212

1213

**Supplementary Text 5 Figure 3. ERFB is optimal under small perturbation of initial conditions of sub-optimal run.** This is the sub-optimal run with a grid size of 201 by 201. The optimal region is very small and outperforms ERFB because the increased control is offered by a higher dose of fungicide *B* (A). However, a small perturbation away from the initial conditions removes this effect, and we find that the ERFB strategy is optimal again (B). Here the green region no longer exists and the optimum effective life is now 9 (yellow).

If we gradually decrease resistance frequencies, the scenario can change from something analogous to panel B to something analogous to panel A. This is because the doses which achieve yields fractionally above 95% in the final year may not be the same as those which are best for longer term resistance management, since control and resistance management may not align in any given year. In practice there are very few cases where this phenomenon is observable, as shown by the fact it does not impact 99% of cases.

**Parameter values:**

**Pathogen parameters, A:** see Supplementary Text 5 Table 1, scenario A.

**Pathogen parameters, B:**  $(I_{rr}^B, I_{rs}^B, I_{sr}^B, I_{ss}^B) = (1.1 \times I_{rr}^A, 0.9 \times I_{rs}^A, 1.1 \times I_{sr}^A, 1 - I_{rr}^B - I_{rs}^B - I_{sr}^B)$ .

1215

1216

### Run in which equal selection in the first year outperformed equal resistance frequencies at breakdown

There was a single case out of the 500 in which equal selection in the first year (ESFY) gave an improved output relative to ERFB. Here the best ERFB effective life matched the optimal value from the 51 by 51 grid, but the best ESFY effective life was one year greater than this optimal grid value (Supplementary Text 5 Figure 4). Note that Supplementary Text 5 Figure 4 uses a denser grid of 201 by 201 to adequately illustrate this effect. See also Supplementary Text 5 Figure 5. Note that the comparison in the parameter scan was between the 51 by 51 grid, ESFY and ERFB; it is possible that there are other cases where a finer grid might find

1223

1224

1225

small regions which achieve one year greater than the ERFB optimum and the 51 by 51 grid optimum.

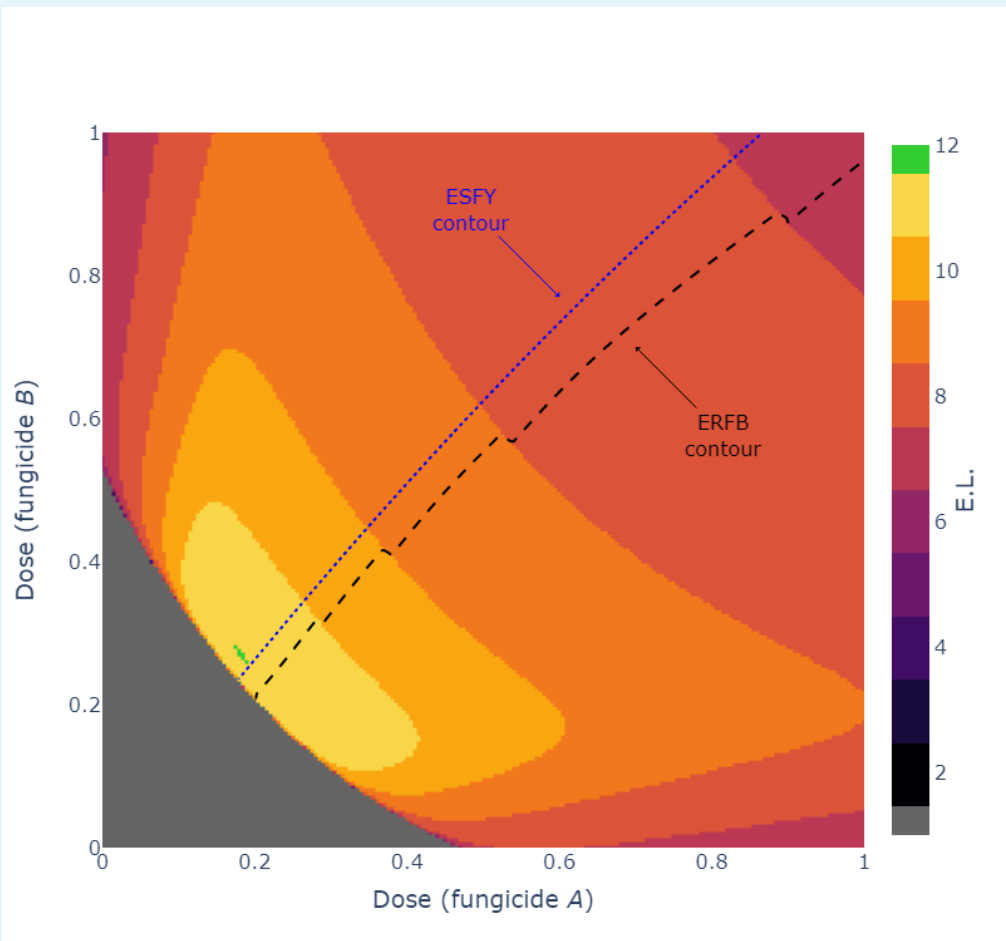

1226

1227

1228

1229

1230

1231

1232

1233

1234

**Supplementary Text 5 Figure 4. The single case where ESFY outperformed ERFB.** In this case the ESFY contour passes through the optimal region, but the ERFB contour does not. This was the only case in which this happened. Although ERFB is sub-optimal on the 201 by 201 grid, it was optimal on the coarser 51 by 51 grid.

**Parameter values:** Initial frequencies:  $I_{rr} = 1.3122930696727086 \times 10^{-10}$ ,  
 $I_{rs} = 1.3687346286628245 \times 10^{-7}$ ,  $I_{sr} = 9.216054320447214 \times 10^{-7}$ ,  $I_{ss} = 0.9999989413898756$ ,  
 $q_B = 0.0334369453801207$ . Fungicide parameters:  $\omega_A = 0.5100900734551262$ ,  $\theta_A = 5.336781378462673$ ,  
 $\Lambda_A = 0.003895561458581$ ,  $\omega_B = 0.8667335745106877$ ,  $\theta_B = 4.618154403228932$ ,  $\Lambda_B = 0.0080007828566827$ .

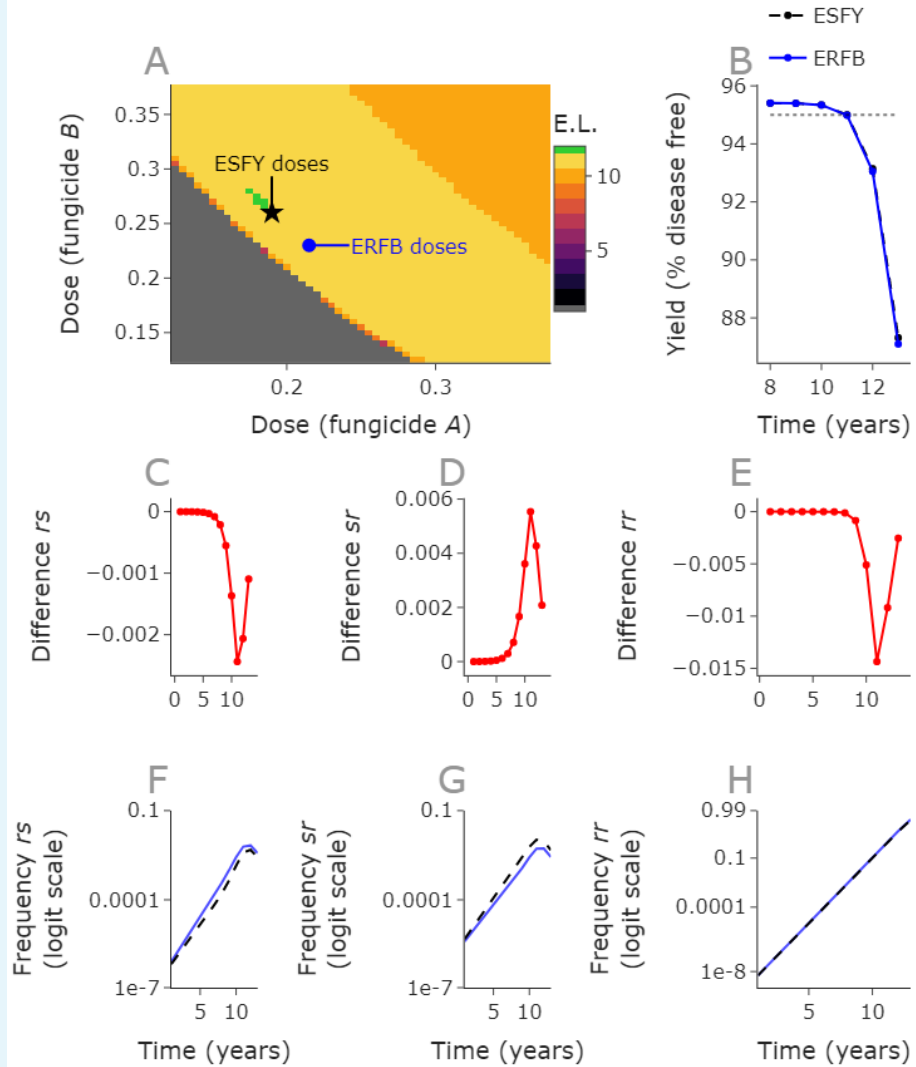

1236  
1237  
1238  
1239  
1240  
1241  
1242  
1243  
1244  
1245  
1246  
1247

**Supplementary Text 5 Figure 5. The single case where ESFY outperformed ERFB - explained.**

The optimal strategy achieves a yield of 95.002% in year 11, compared to the ERFB strategy which achieves 94.99% in this year (B). The optimal strategy fails in year 12, whereas the ERFB strategy fails in year 11 (A). In this case the ERFB strategy selects less strongly for the  $r_s$  and  $r_r$  strains but more strongly for the  $s_r$  strain.

**Parameter values:** Initial frequencies:  $I_{rr} = 1.3122930696727086 \times 10^{-10}$ ,  $I_{rs} = 1.3687346286628245 \times 10^{-7}$ ,  $I_{sr} = 9.216054320447214 \times 10^{-7}$ ,  $I_{ss} = 0.9999989413898756$ ,  $q_B = 0.0334369453801207$ . Fungicide parameters:  $\omega_A = 0.5100900734551262$ ,  $\theta_A = 5.336781378462673$ ,  $\Lambda_A = 0.003895561458581$ ,  $\omega_B = 0.8667335745106877$ ,  $\theta_B = 4.618154403228932$ ,  $\Lambda_B = 0.0080007828566827$ , Doses: ESFY = 0.19, 0.26, ERFB = 0.215, 0.23.
